# Supplementary material for: Phosphine-catalyzed regiospecific (3 + 2) cyclization of 3-nitroindoles with allene esters
Source: Royal Society of Chemistry journal article supplement (doi:10.1039/c9ob00432g), 2019-01-01

## ***Supporting Information***

### **Phosphine-Catalyzed Regiospecific (3+2) Cyclization of 3-Nitroindoles with Allene Esters**

Li-Wen Jin, Fei Jiang, Ke-Wei Chen, Bai-Xiang Du\*, Guang-Jian Mei\* and Feng Shi\*

*School of Chemistry and Materials Science, Jiangsu Normal University, Xuzhou, 221116, China*

#### **Contents:**

- 1. NMR spectra of products 3 (S2-S23)**
- 2. X-ray single crystal data for compound 3aa (S24-S25)**
- 3. HPLC copies of product 3aa (S26)**

# 1. NMR spectra of products 3

## NMR spectra of products 3

$^1\text{H}$  NMR (400 MHz,  $\text{CDCl}_3$ ) of compound **3aa**

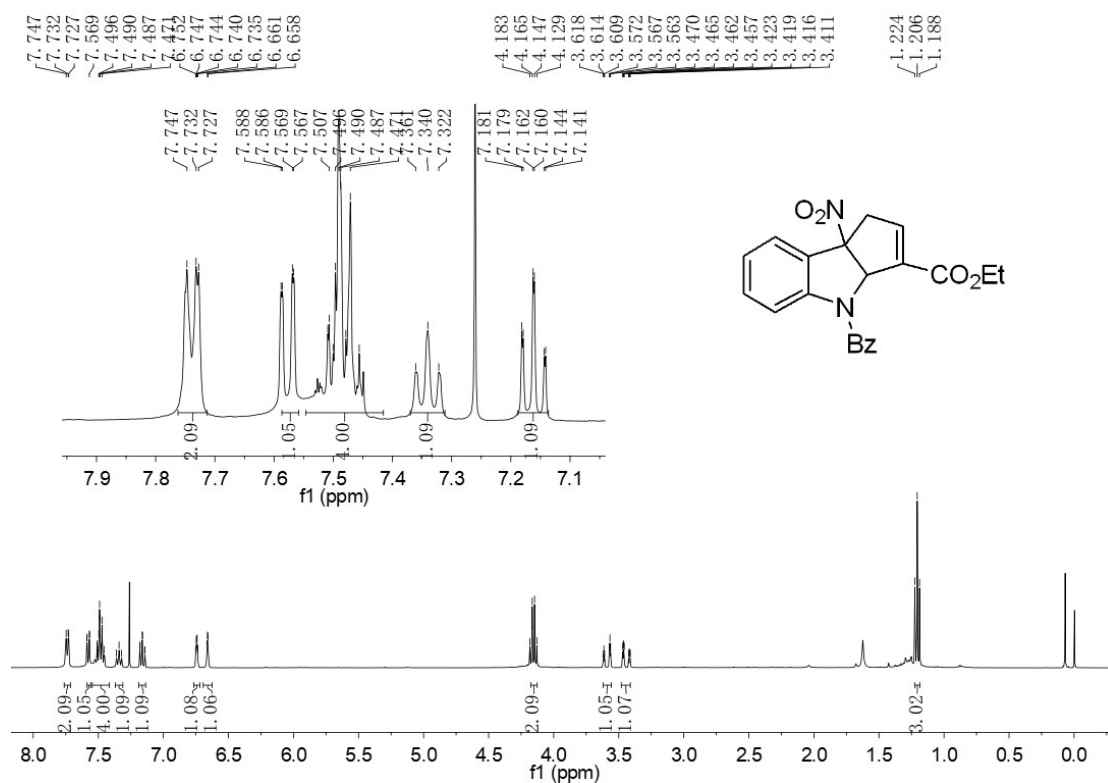

$^{13}\text{C}$  NMR (100 MHz,  $\text{CDCl}_3$ ) of compound **3aa**

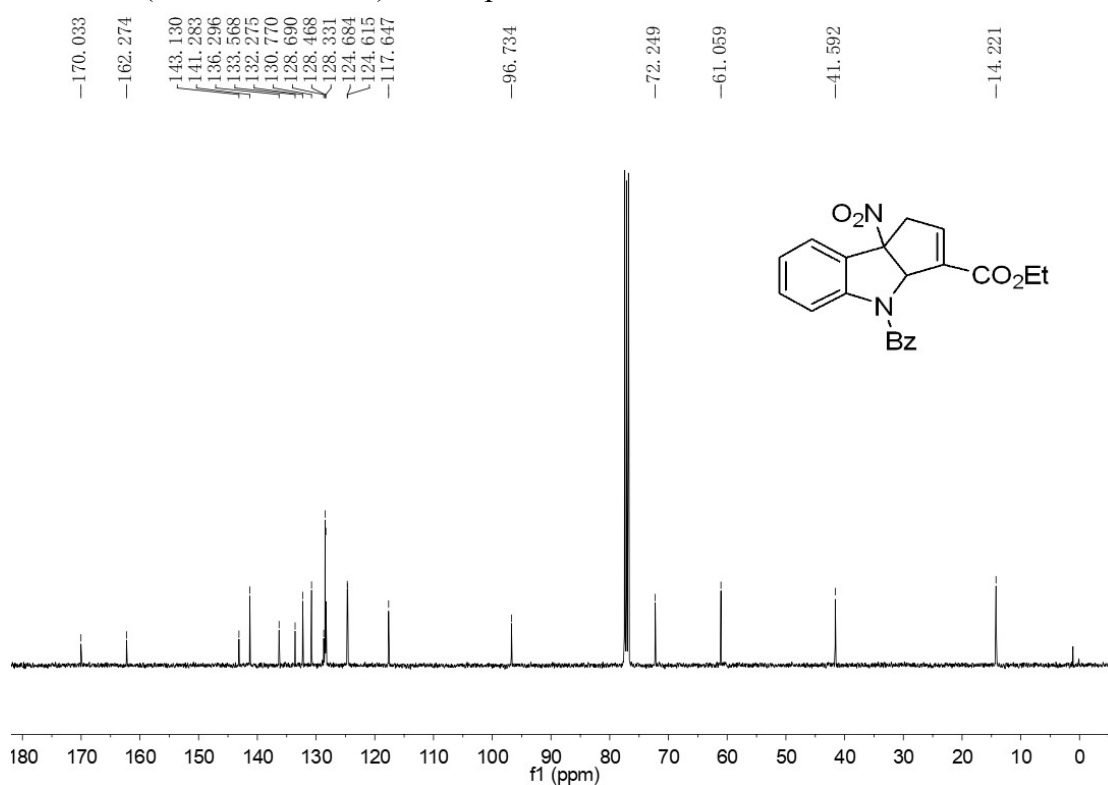

$^1\text{H}$  NMR (400 MHz,  $\text{CDCl}_3$ ) of compound **3ba**

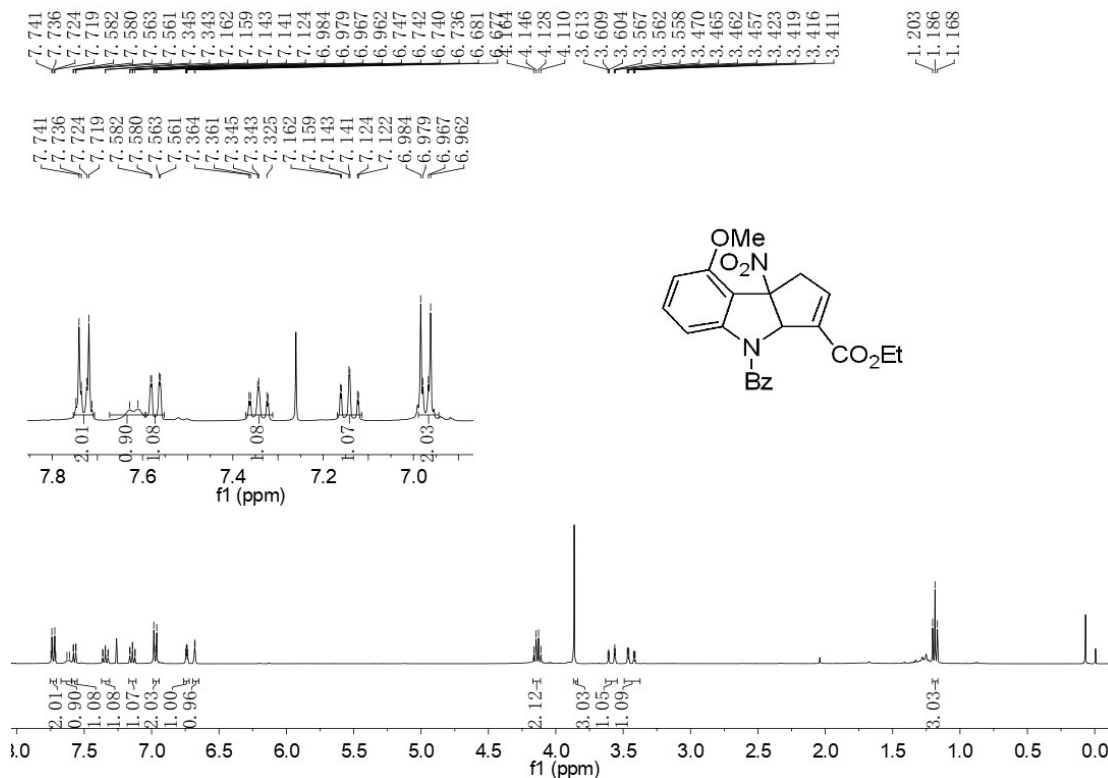

$^{13}\text{C}$  NMR (100 MHz,  $\text{CDCl}_3$ ) of compound **3ba**

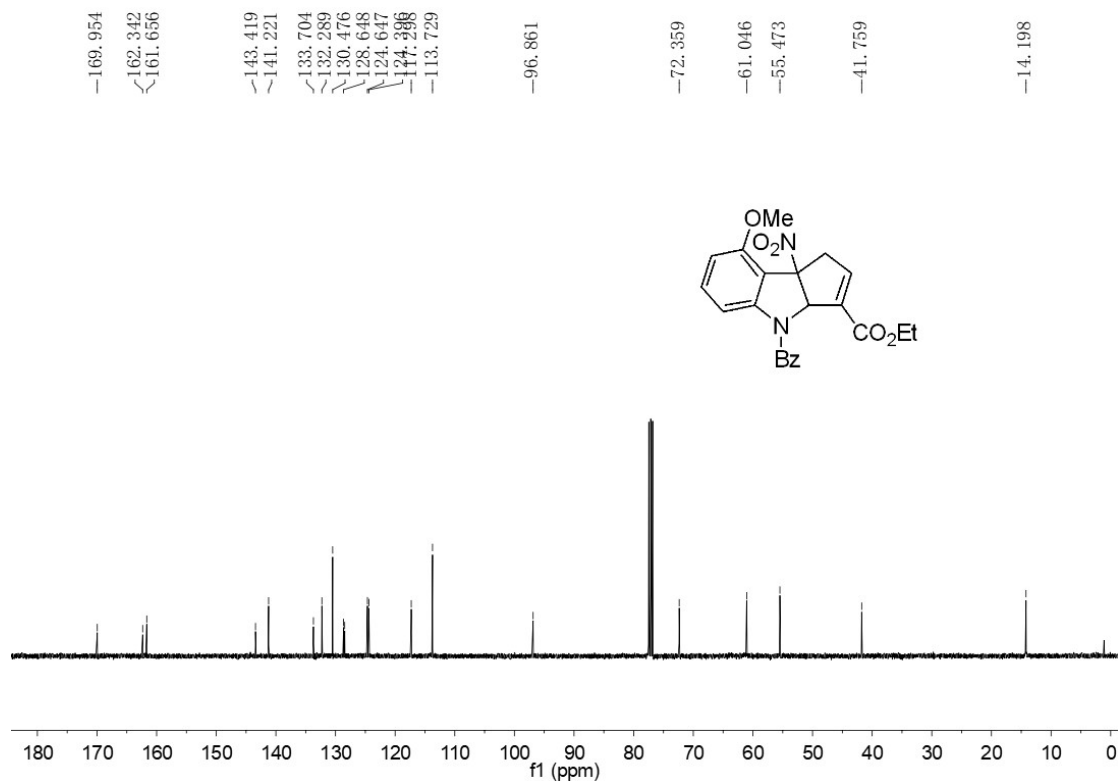

$^1\text{H}$  NMR (400 MHz,  $\text{CDCl}_3$ ) of compound **3ca**

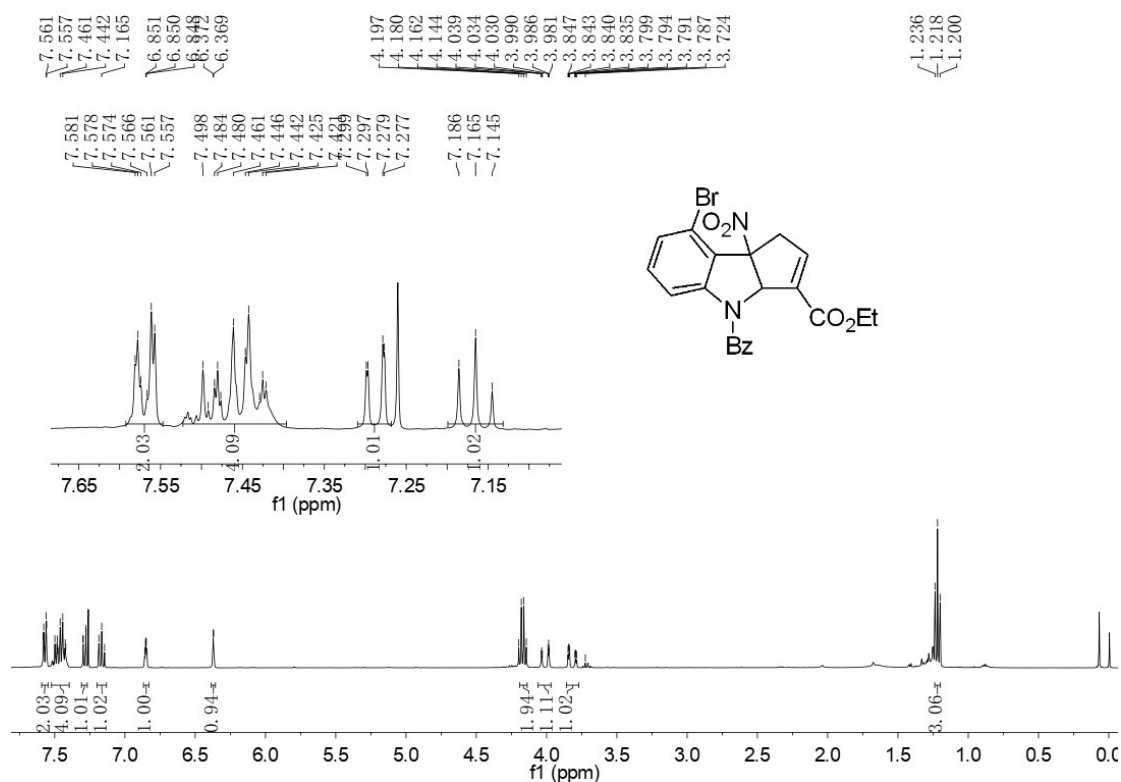

$^{13}\text{C}$  NMR (100 MHz,  $\text{CDCl}_3$ ) of compound **3ca**

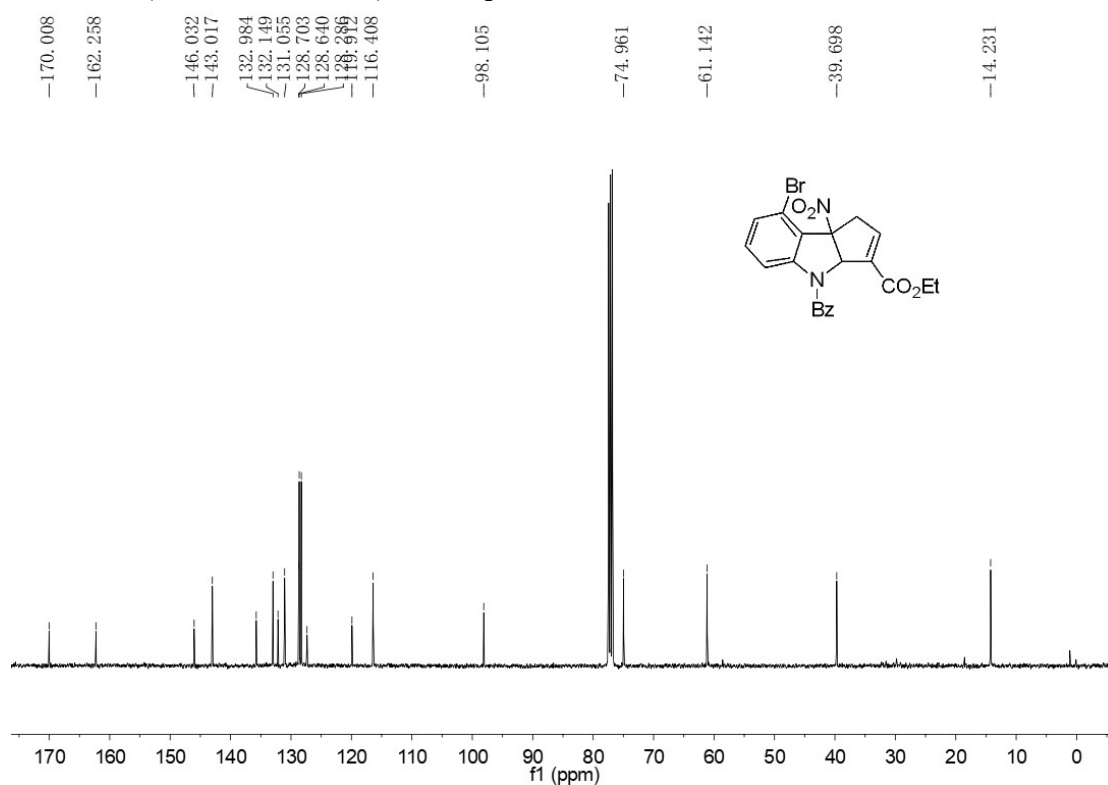

$^1\text{H}$  NMR (400 MHz,  $\text{CDCl}_3$ ) of compound **3da**

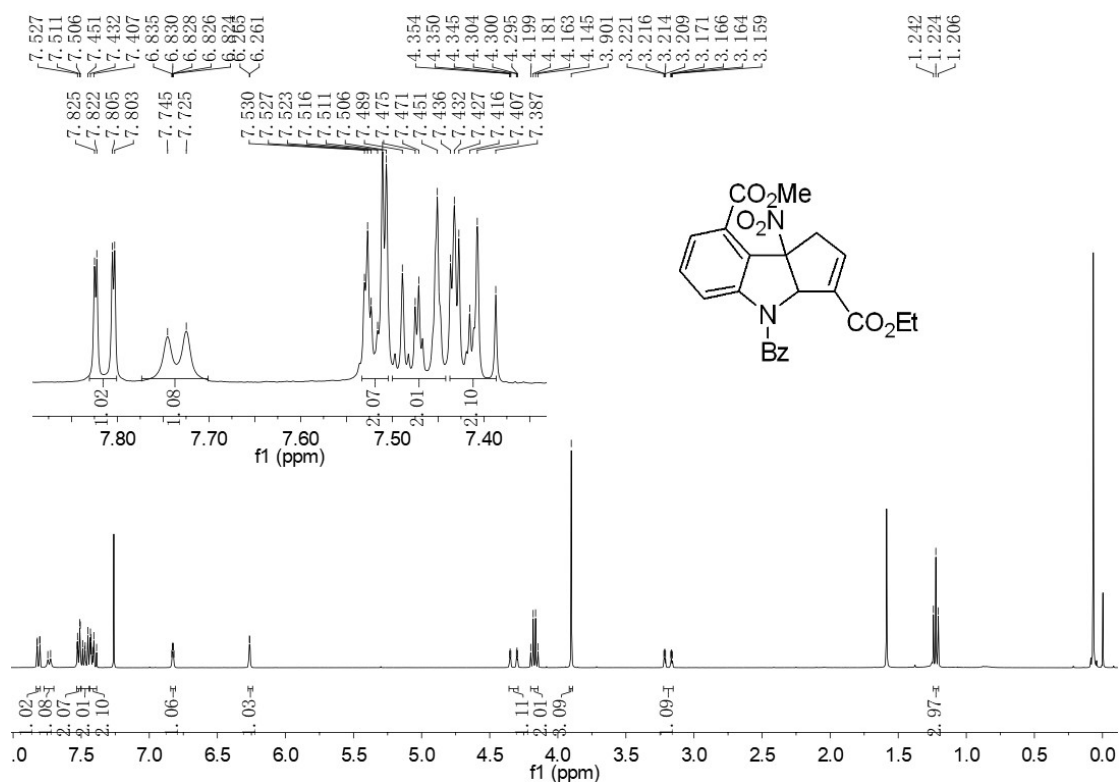

$^{13}\text{C}$  NMR (100 MHz,  $\text{CDCl}_3$ ) of compound **3da**

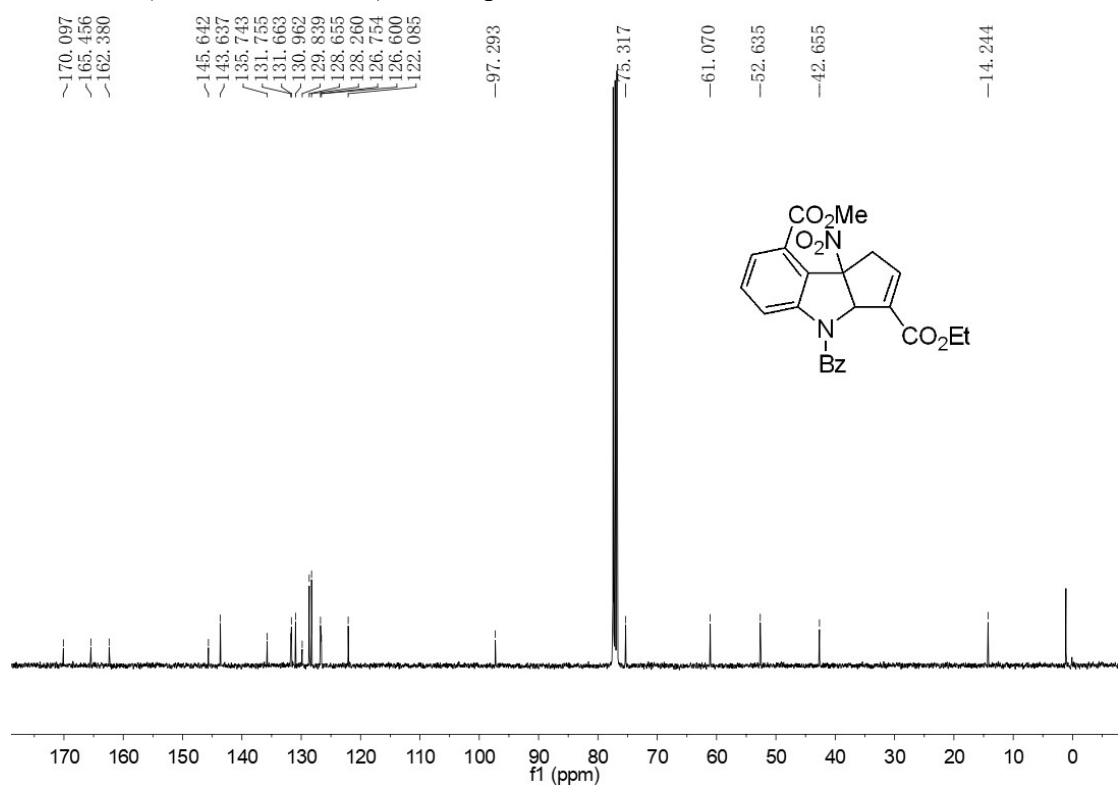

$^1\text{H}$  NMR (400 MHz,  $\text{CDCl}_3$ ) of compound **3ea**

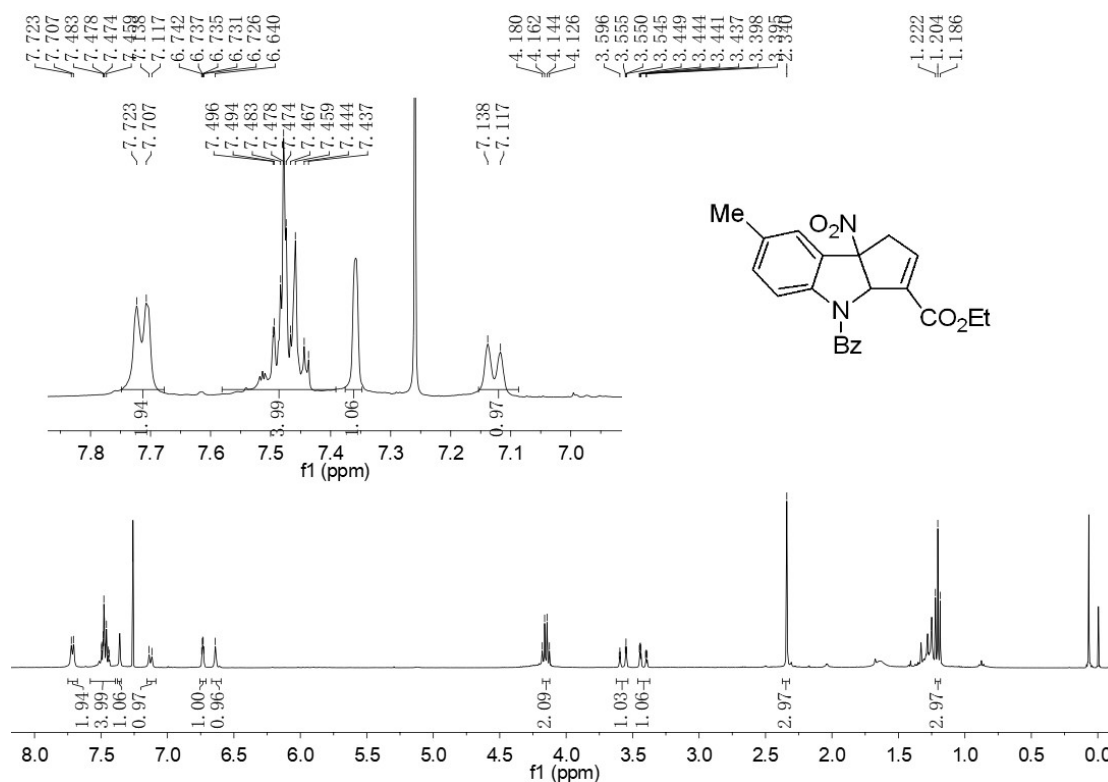

$^{13}\text{C}$  NMR (100 MHz,  $\text{CDCl}_3$ ) of compound **3ea**

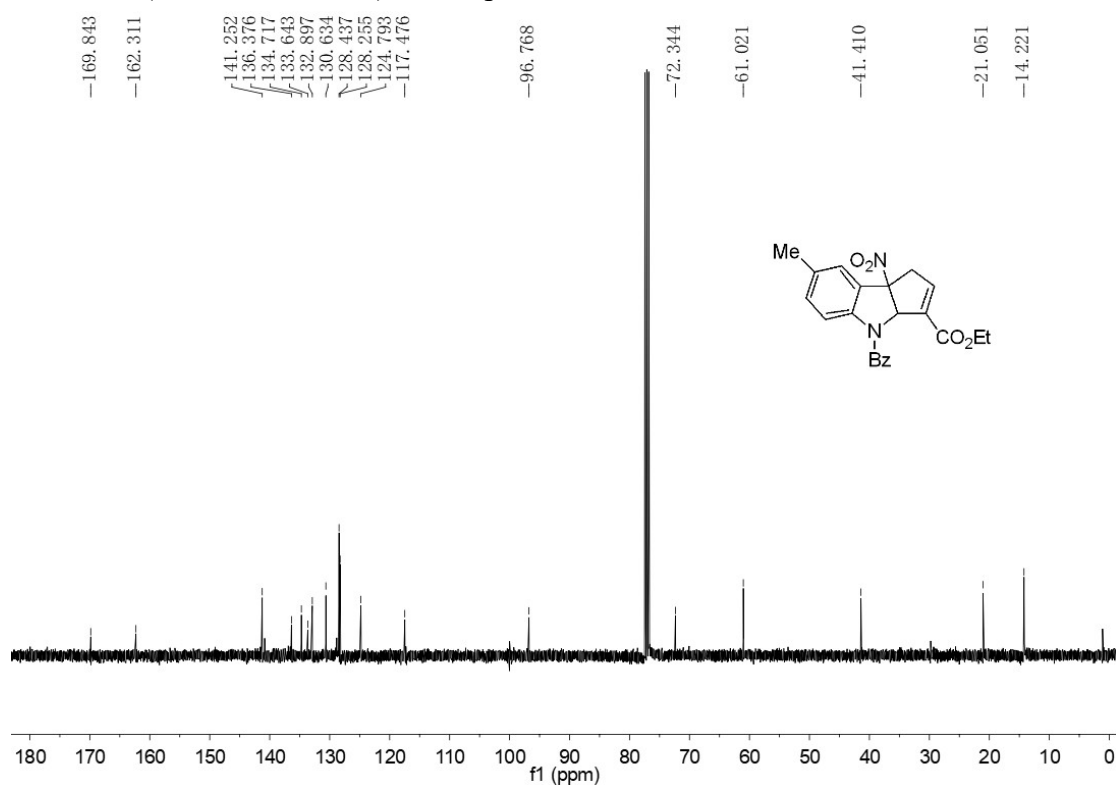

<sup>1</sup>H NMR (400 MHz, CDCl<sub>3</sub>) of compound **3fa**

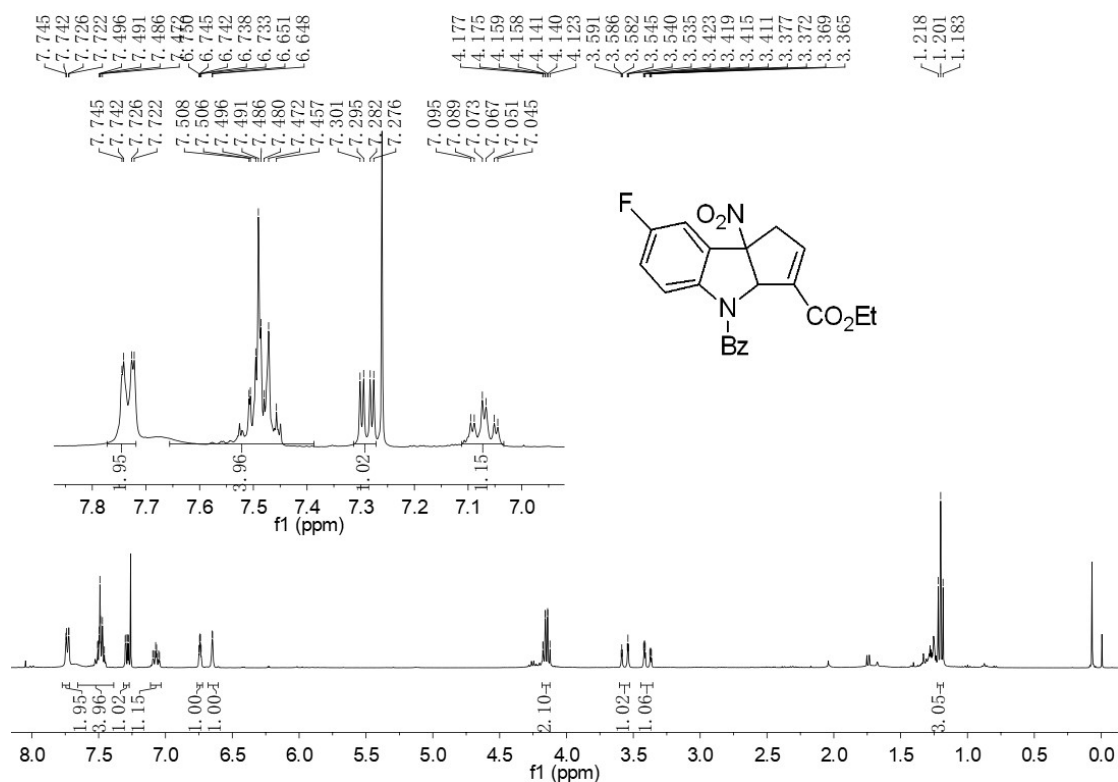

<sup>13</sup>C NMR (100 MHz, CDCl<sub>3</sub>) of compound **3fa**

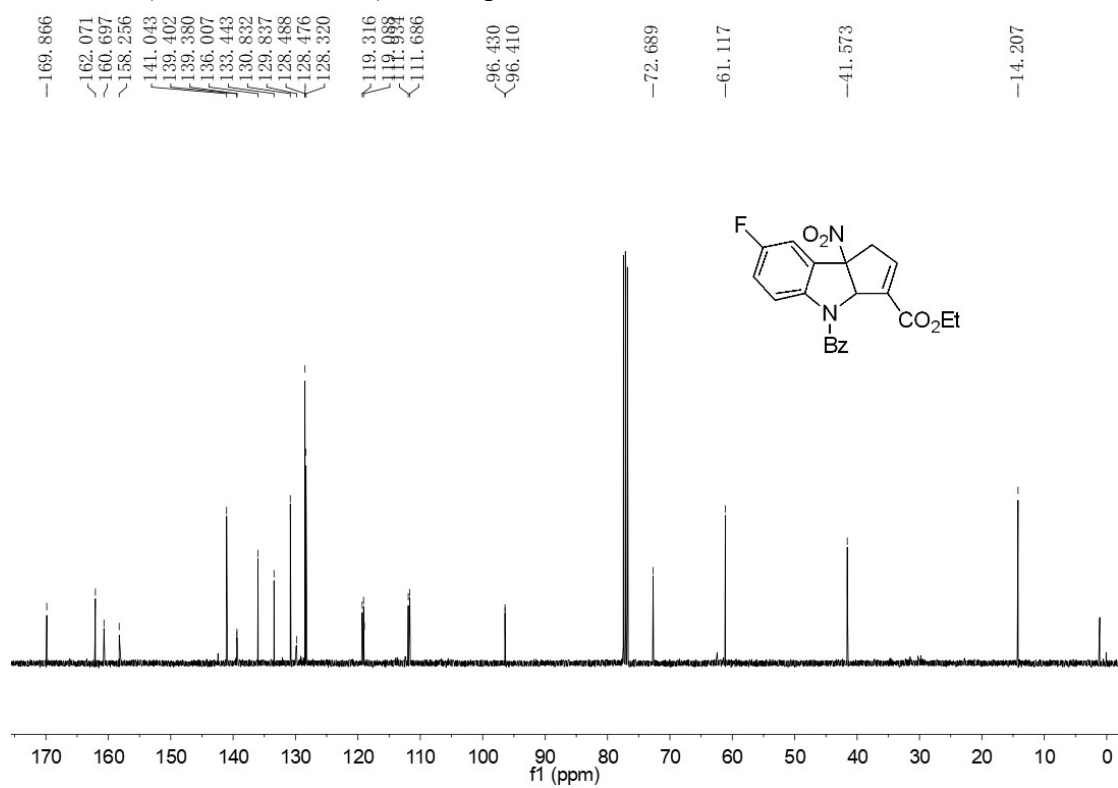

$^1\text{H}$  NMR (400 MHz,  $\text{CDCl}_3$ ) of compound **3ga**

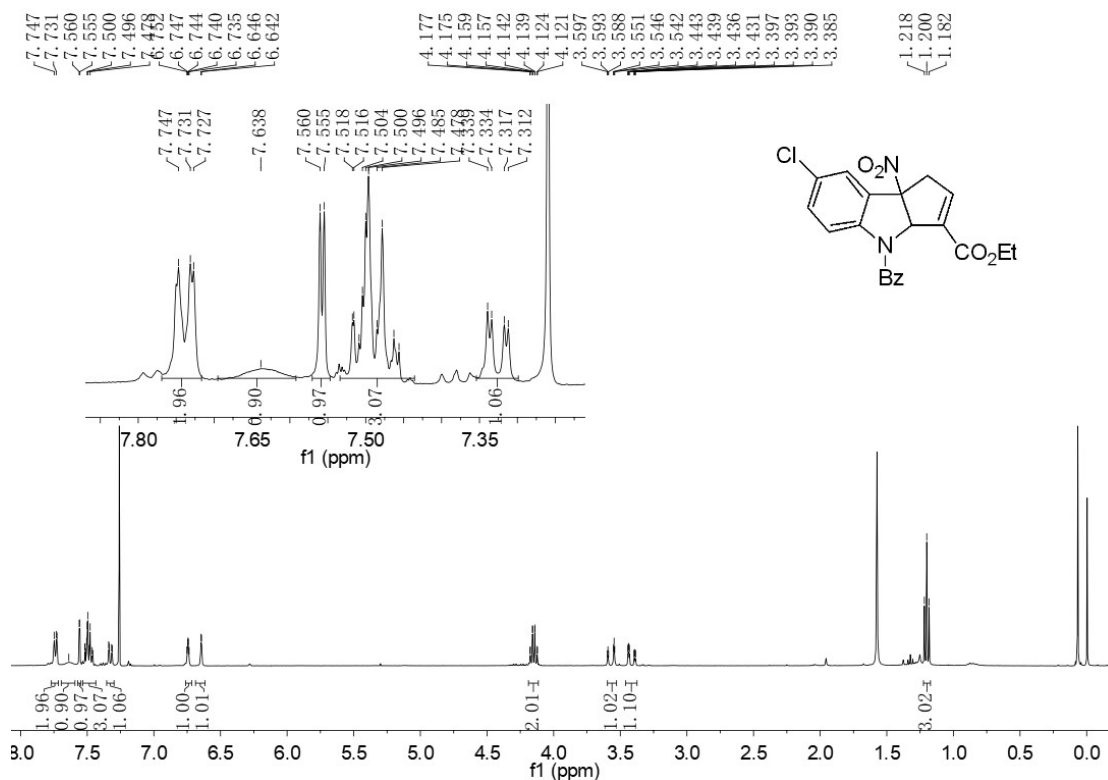

$^{13}\text{C}$  NMR (100 MHz,  $\text{CDCl}_3$ ) of compound **3ga**

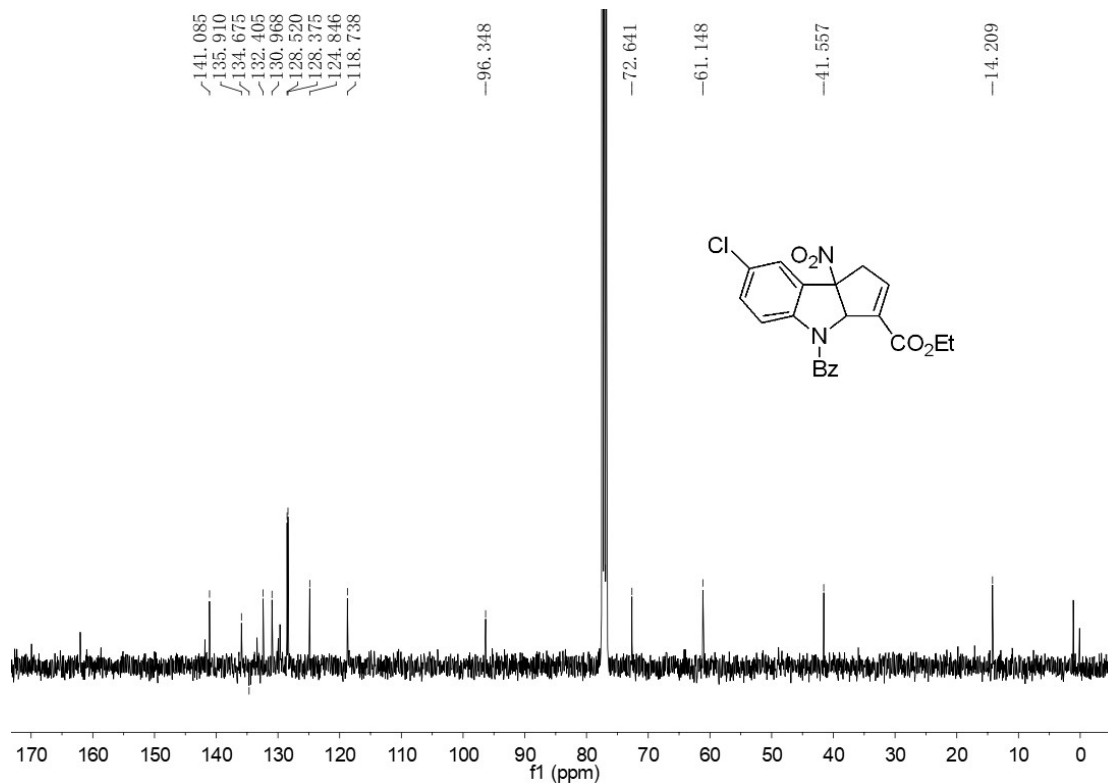



$^1\text{H}$  NMR (400 MHz,  $\text{CDCl}_3$ ) of compound **3ha**

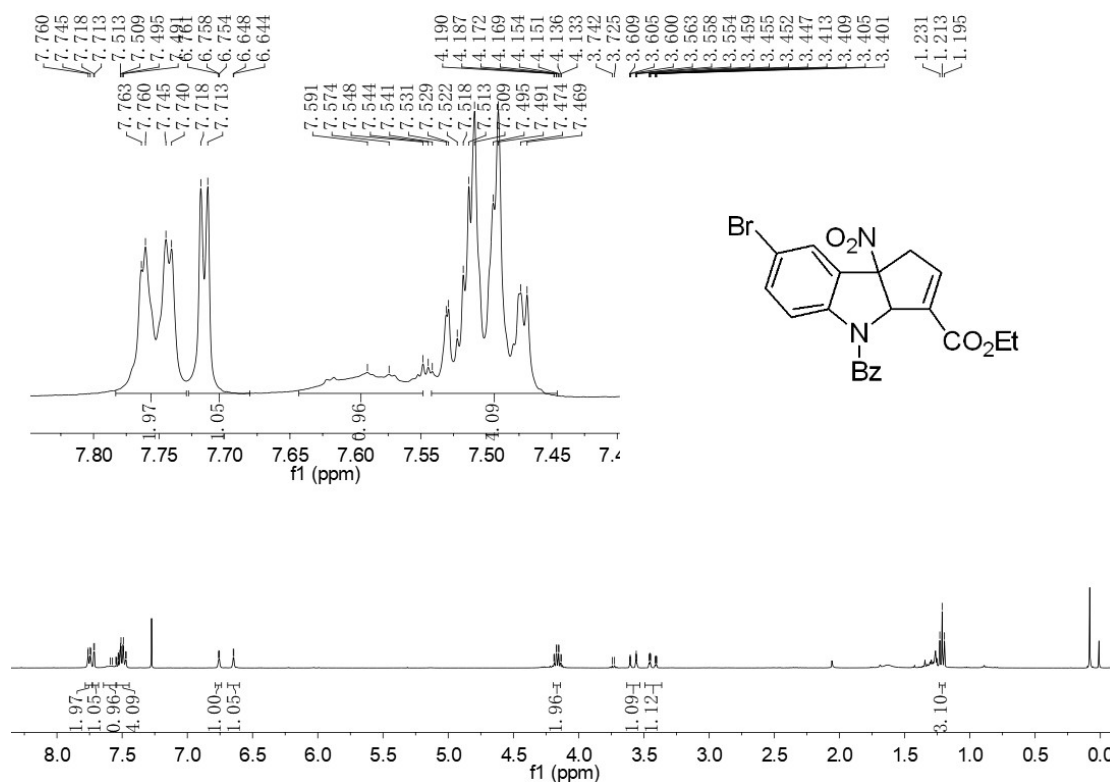

$^{13}\text{C}$  NMR (100 MHz,  $\text{CDCl}_3$ ) of compound **3ha**

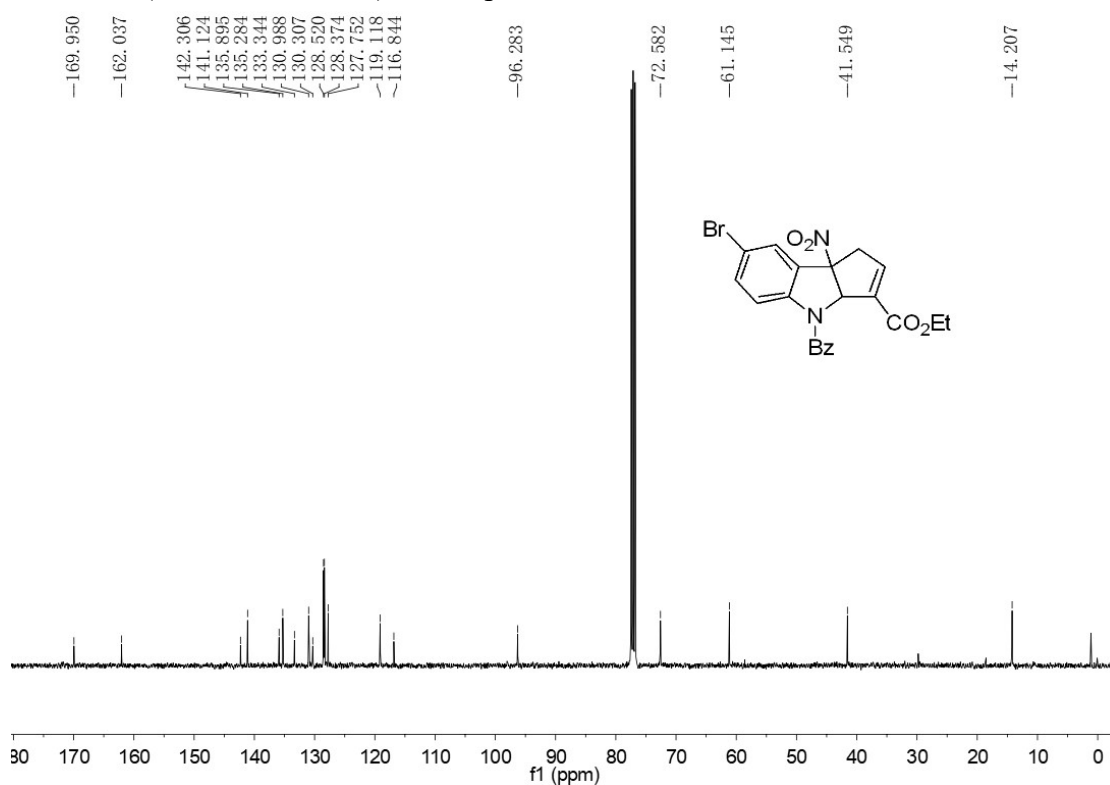

$^1\text{H}$  NMR (400 MHz,  $\text{CDCl}_3$ ) of compound **3ia**

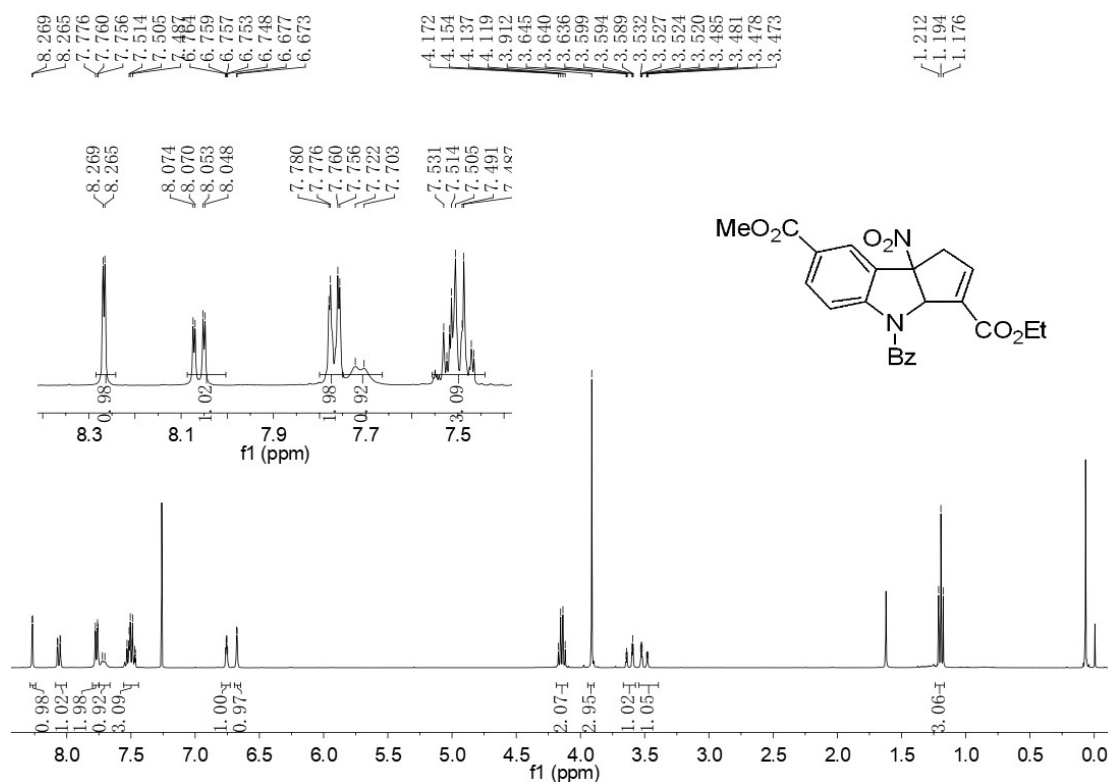

$^{13}\text{C}$  NMR (100 MHz,  $\text{CDCl}_3$ ) of compound **3ia**

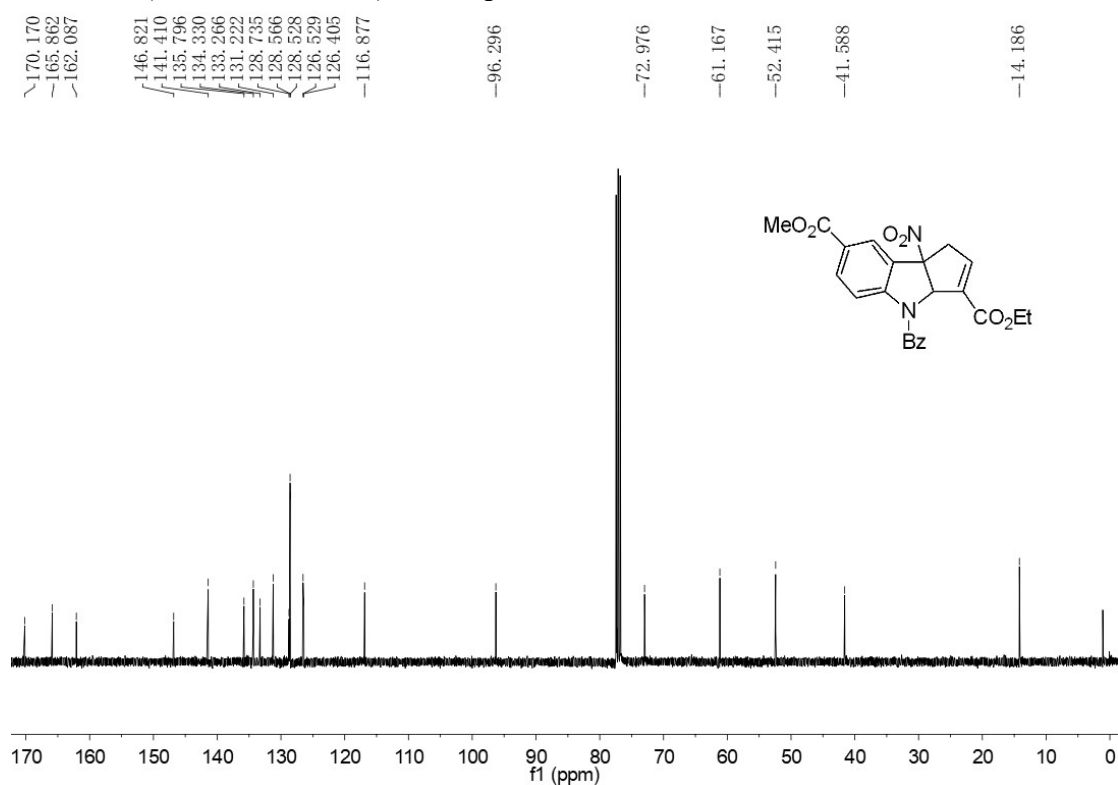

<sup>1</sup>H NMR (400 MHz, CDCl<sub>3</sub>) of compound **3ja**

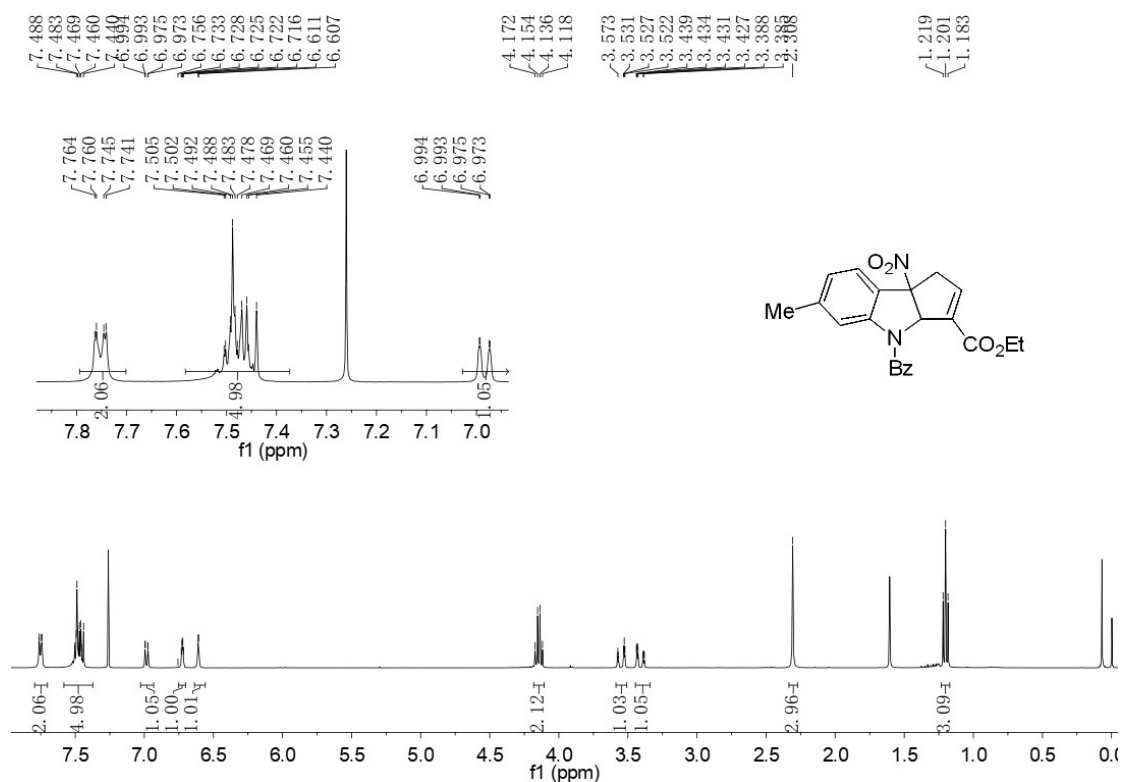

<sup>13</sup>C NMR (100 MHz, CDCl<sub>3</sub>) of compound **3ja**

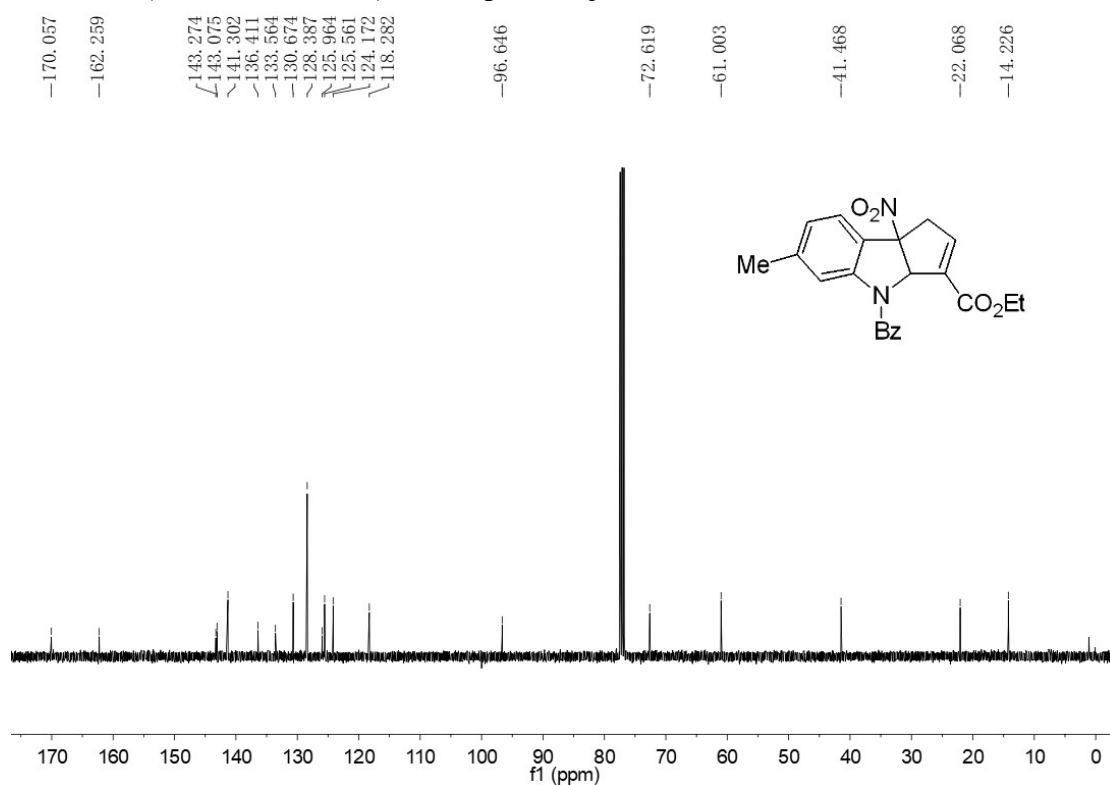

$^1\text{H}$  NMR (400 MHz,  $\text{CDCl}_3$ ) of compound **3ka**

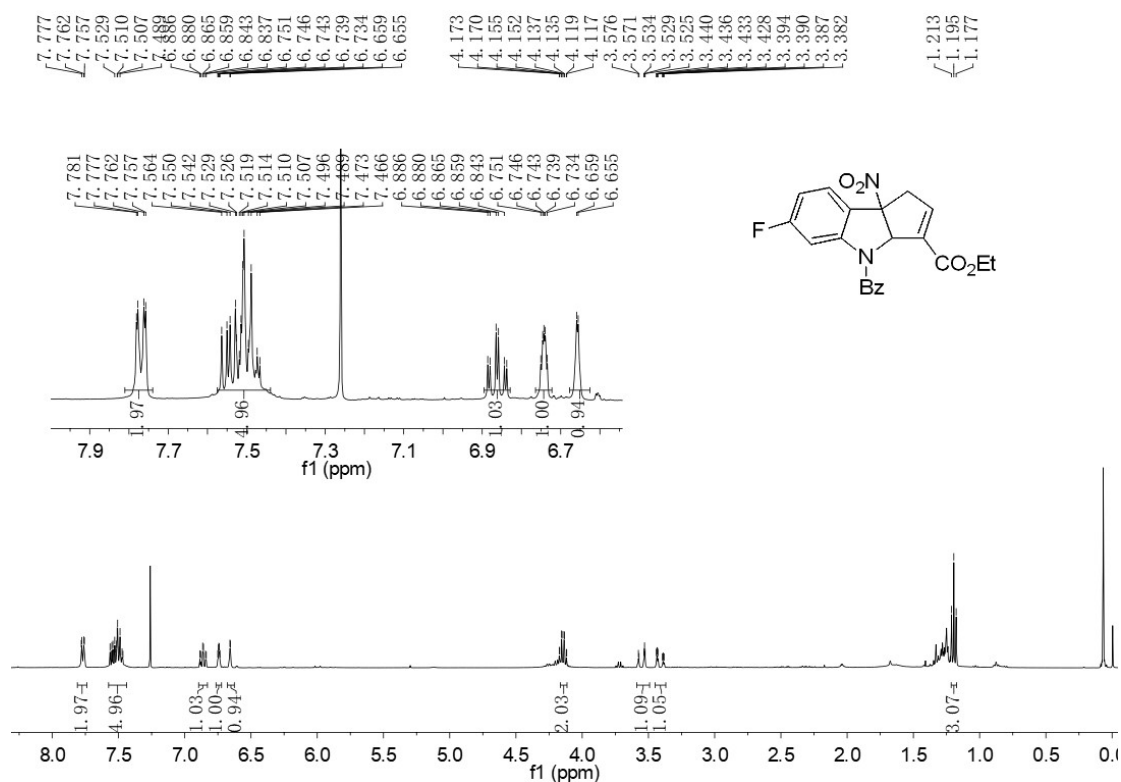

$^{13}\text{C}$  NMR (100 MHz,  $\text{CDCl}_3$ ) of compound **3ka**

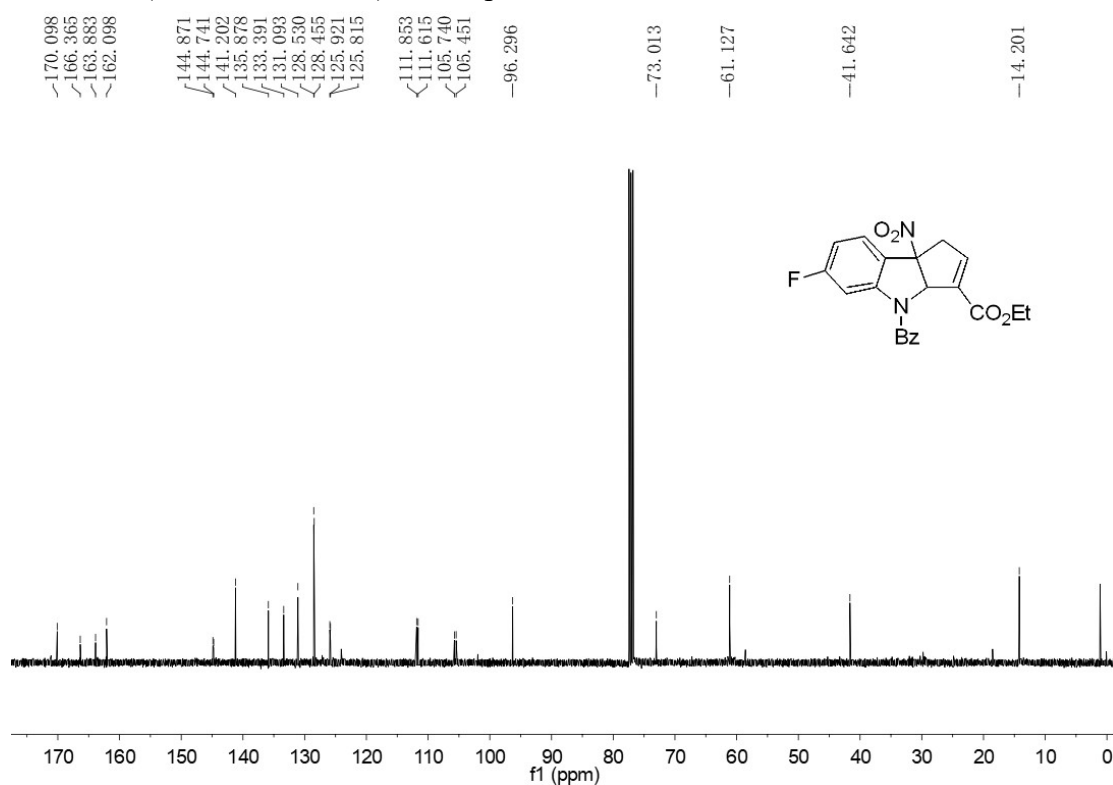

$^1\text{H}$  NMR (400 MHz,  $\text{CDCl}_3$ ) of compound **3la**

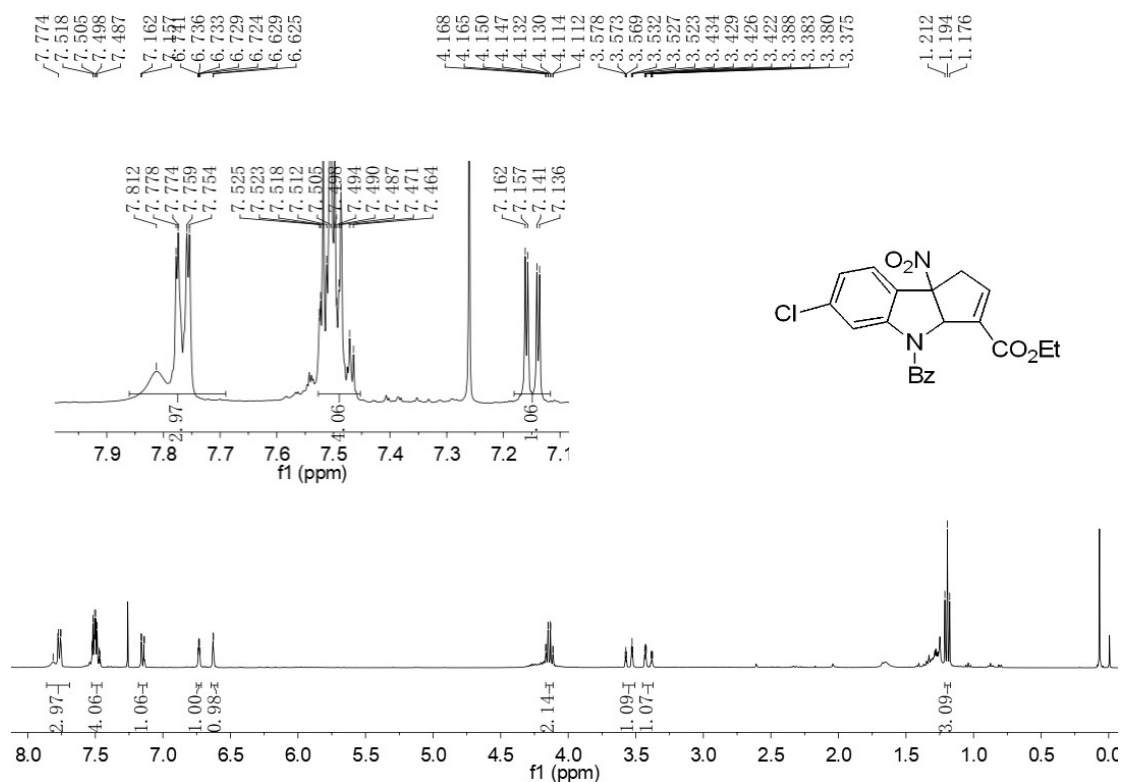

$^{13}\text{C}$  NMR (100 MHz,  $\text{CDCl}_3$ ) of compound **3la**

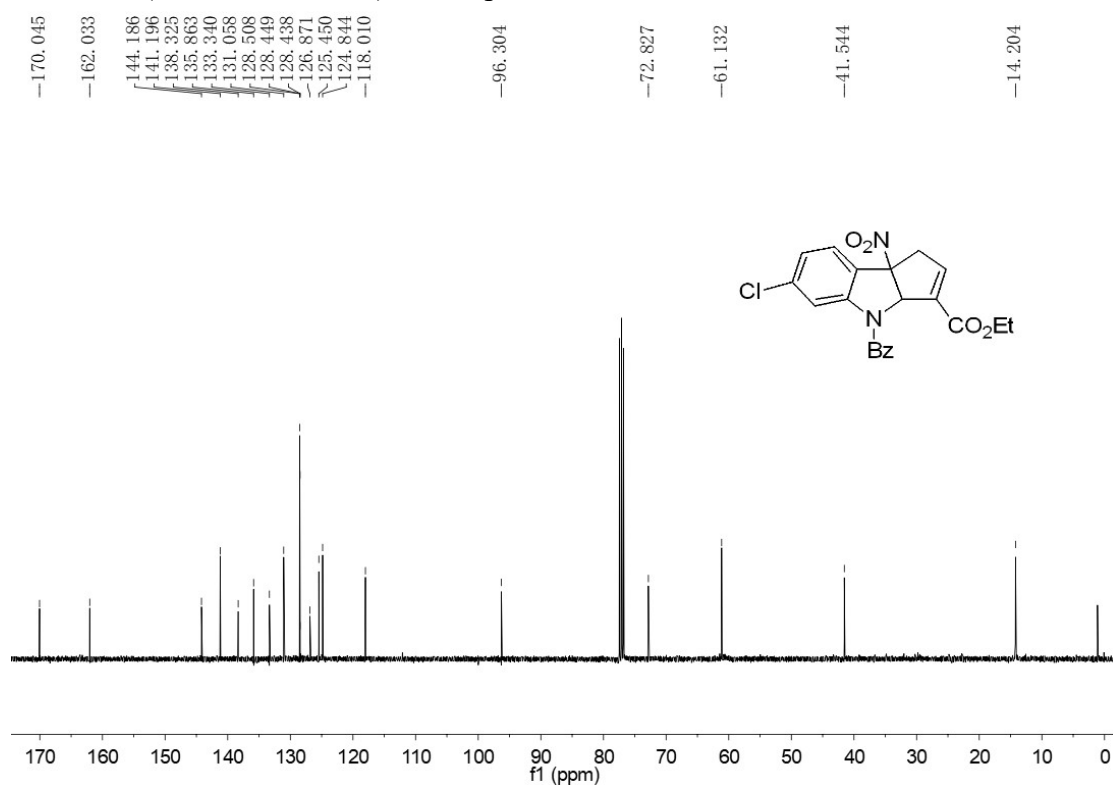

$^1\text{H}$  NMR (400 MHz,  $\text{CDCl}_3$ ) of compound **3ma**

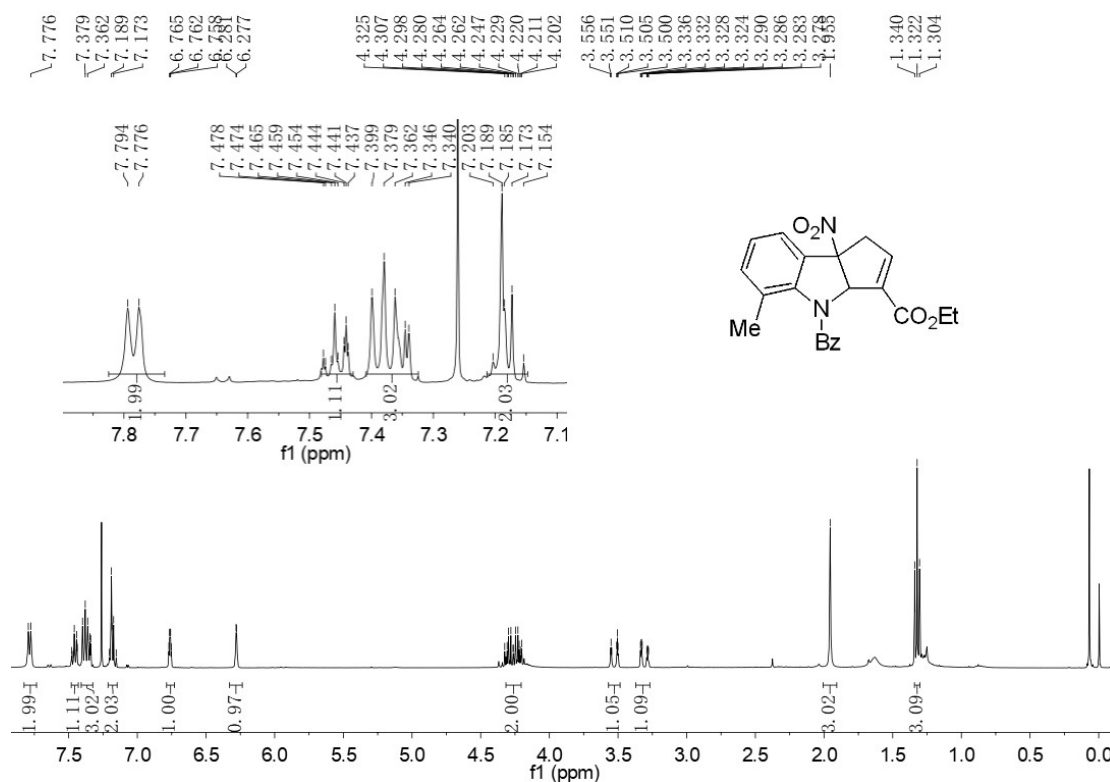

$^{13}\text{C}$  NMR (100 MHz,  $\text{CDCl}_3$ ) of compound **3ma**

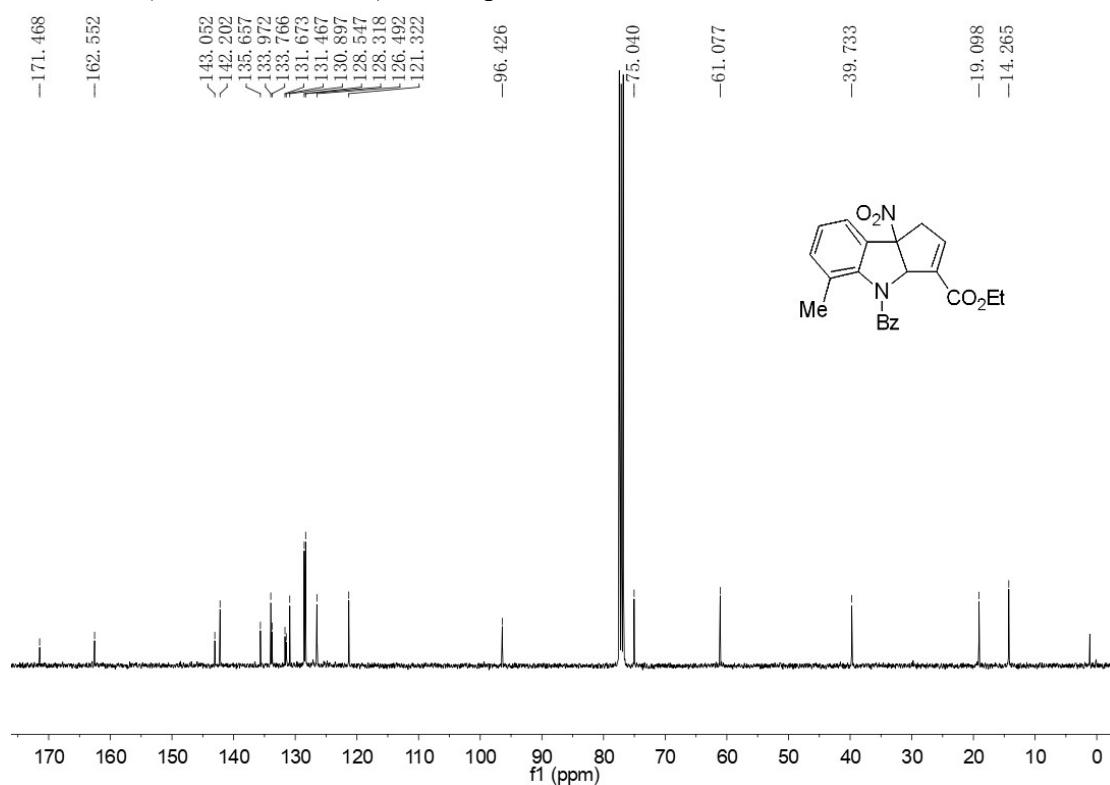

$^1\text{H}$  NMR (400 MHz,  $\text{CDCl}_3$ ) of compound **3na**

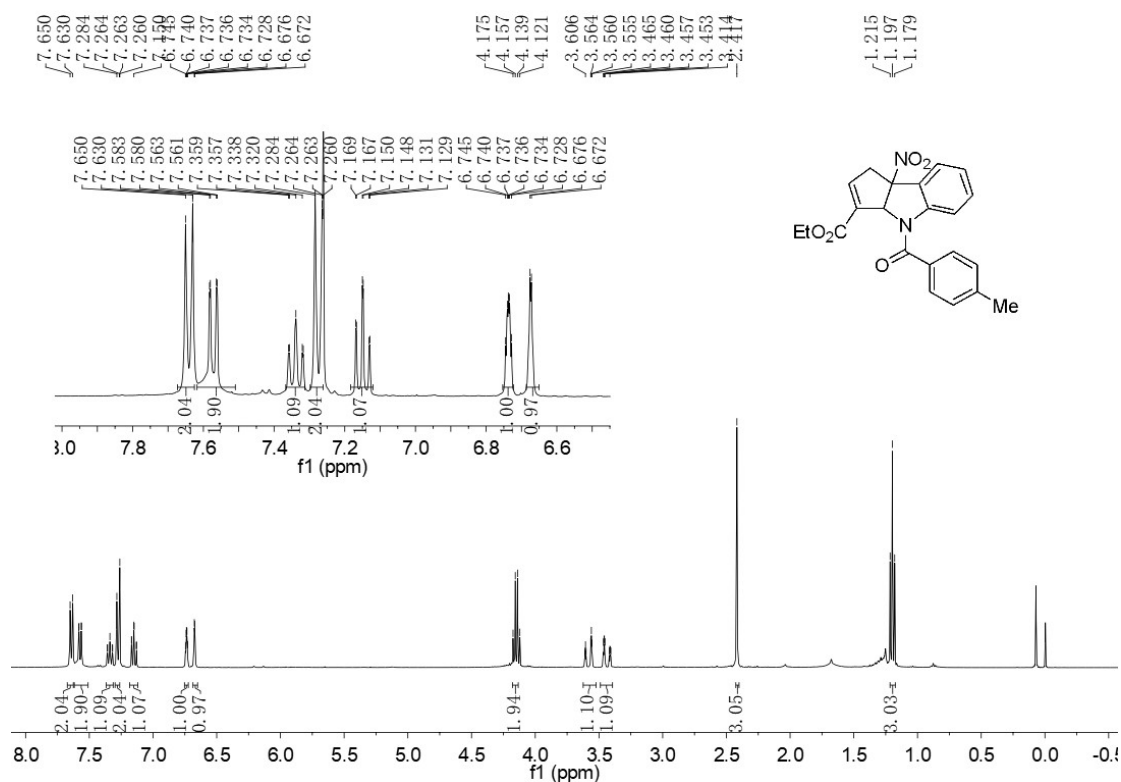

$^{13}\text{C}$  NMR (100 MHz,  $\text{CDCl}_3$ ) of compound **3na**

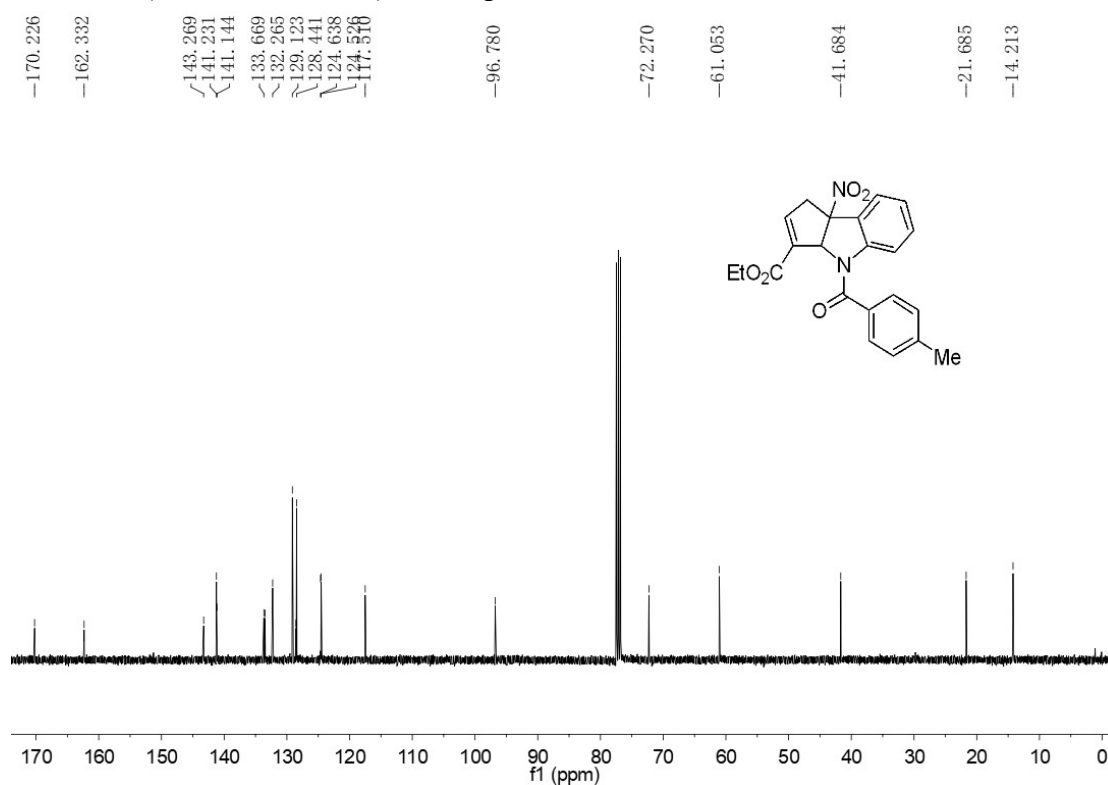

$^1\text{H}$  NMR (400 MHz,  $\text{CDCl}_3$ ) of compound **30a**

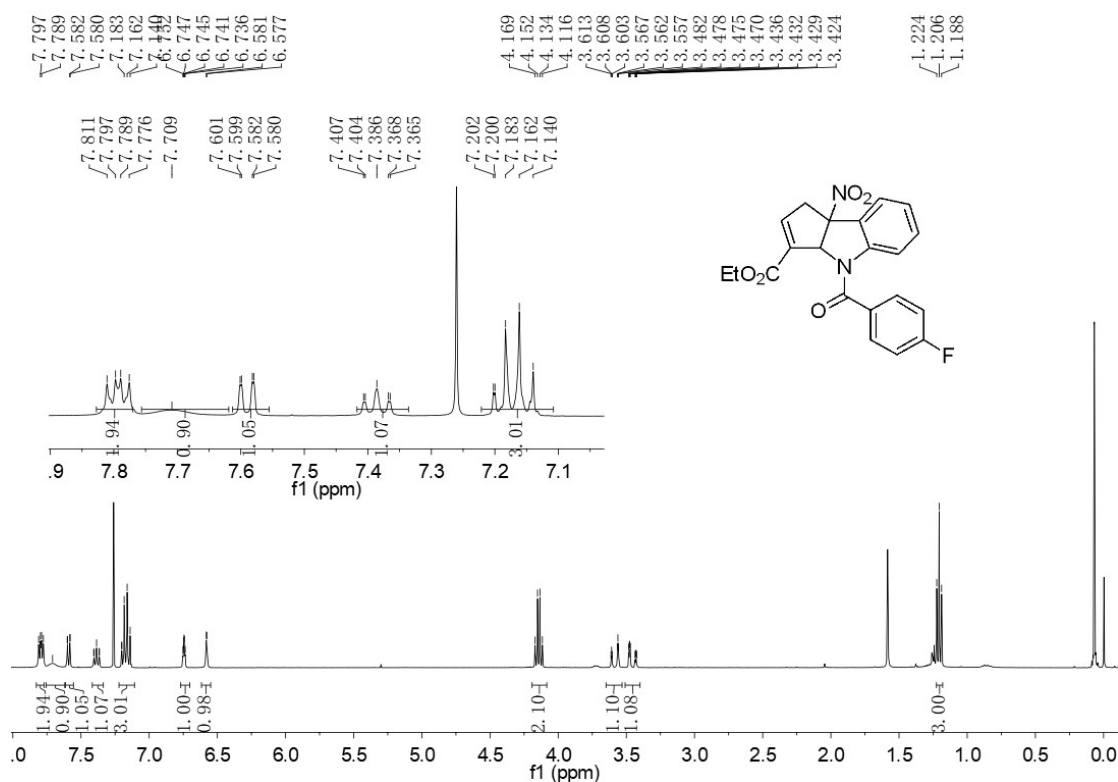

$^{13}\text{C}$  NMR (100 MHz,  $\text{CDCl}_3$ ) of compound **30a**

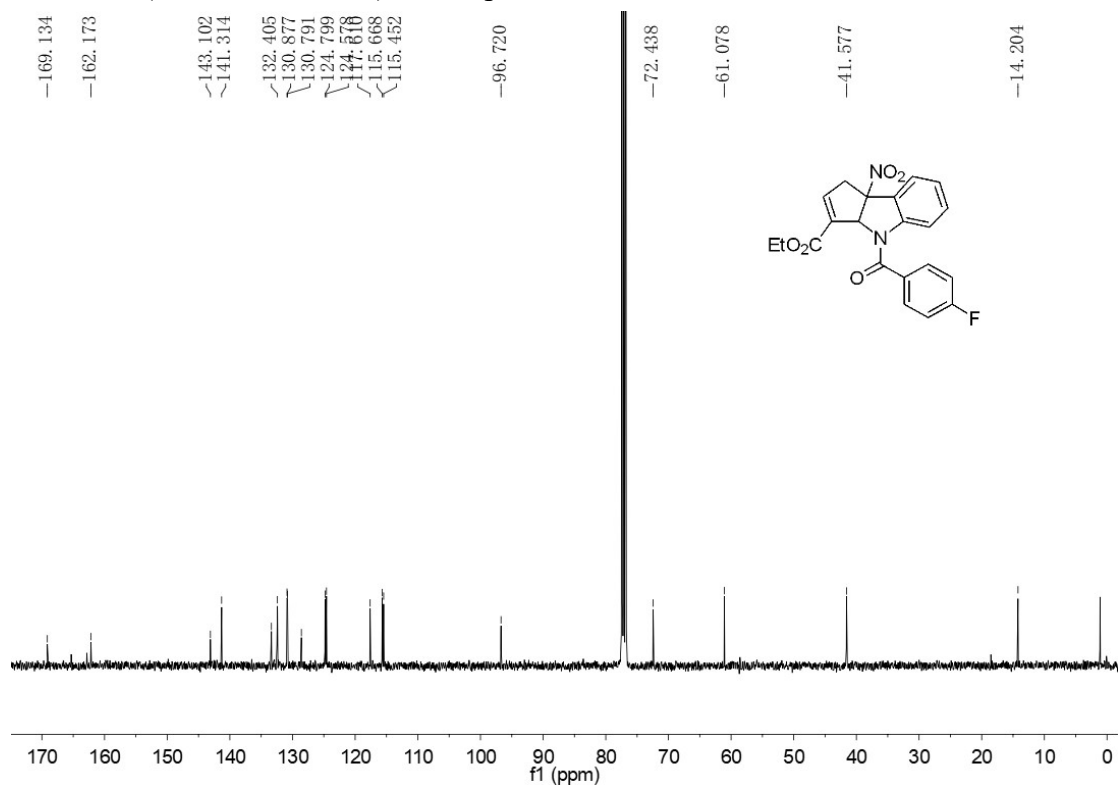



**Chemical structure of compound 10:** CCOC(=O)c1ccc2c(c1)c(c3ccccc3n2C(=O)c4ccc(C(F)(F)F)cc4)[C@@H]5C=CC=C[N+](=O)[O-]5

**<sup>1</sup>H NMR spectrum (CDCl<sub>3</sub>):**

- Chemical shift range: 0.0 to 8.1 ppm.
- Integration values (from left to right): 2.10, 3.00, 1.10, 1.07, 1.05, 1.09, 1.03, 1.94, 1.09, 1.10, 3.06.
- Peak labels (from left to right): 7.909, 7.756, 7.736, 7.598, 7.214, 7.213, 6.745, 6.742, 6.737, 6.493, 7.928, 7.909, 7.756, 7.736, 7.619, 7.617, 7.599, 7.598, 7.440, 7.421, 7.401, 7.233, 7.231, 7.214, 7.212, 7.195, 7.193, 4.171, 4.153, 4.135, 4.117, 3.601, 3.597, 3.592, 3.555, 3.550, 3.490, 3.486, 3.483, 3.483, 3.478, 3.444, 3.440, 3.437, 3.432, 1.228, 1.210, 1.193.

Chemical structure of the compound is shown above the spectrum. The structure is a 1,2,3,4-tetrahydronaphthalene derivative with a nitro group (NO<sub>2</sub>) at position 1, an ethyl ester group (EtO<sub>2</sub>C) at position 2, and a 4-(trifluoromethyl)benzoyl group attached to the nitrogen atom.

Peak values (ppm):

- 168.741
- 162.057
- 142.823
- 141.492
- 139.724
- 128.908
- 125.457
- 125.422
- 125.171
- 124.558
- 117.596
- 96.642
- 77.0
- 72.415
- 61.118
- 41.461
- 14.201

$^1\text{H}$  NMR (400 MHz,  $\text{CDCl}_3$ ) of compound **3qa**

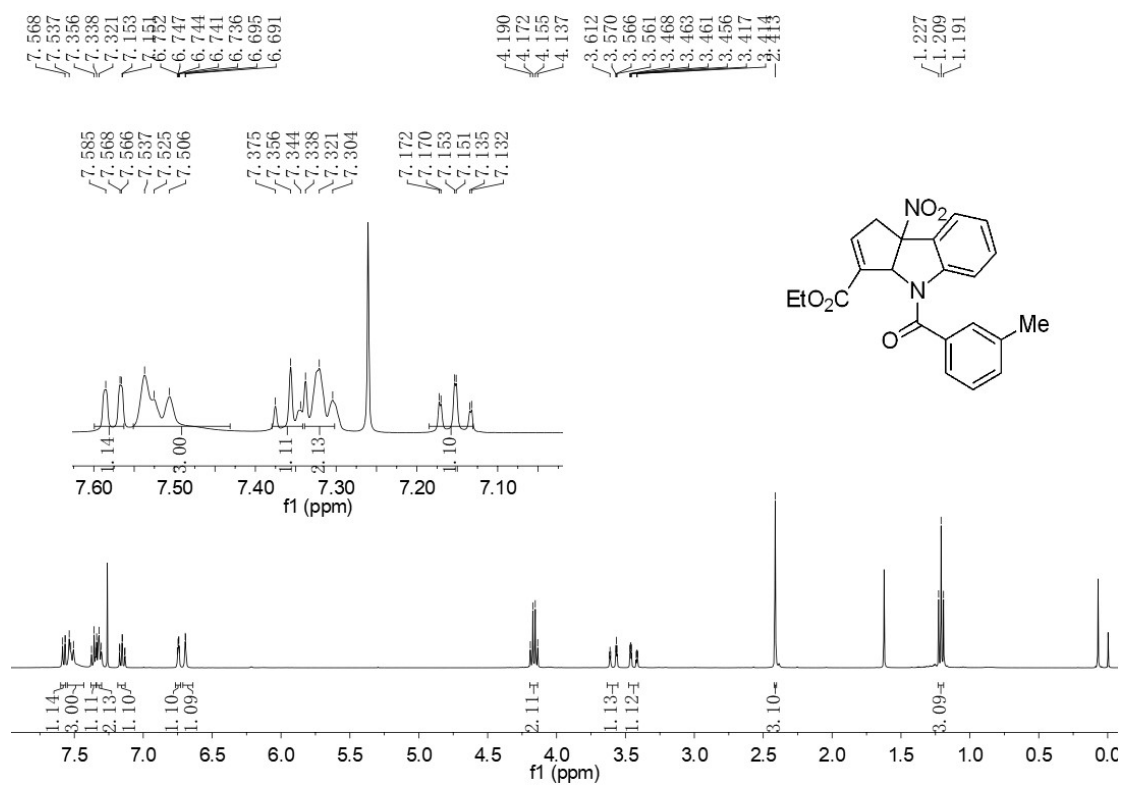

$^{13}\text{C}$  NMR (100 MHz,  $\text{CDCl}_3$ ) of compound **3qa**

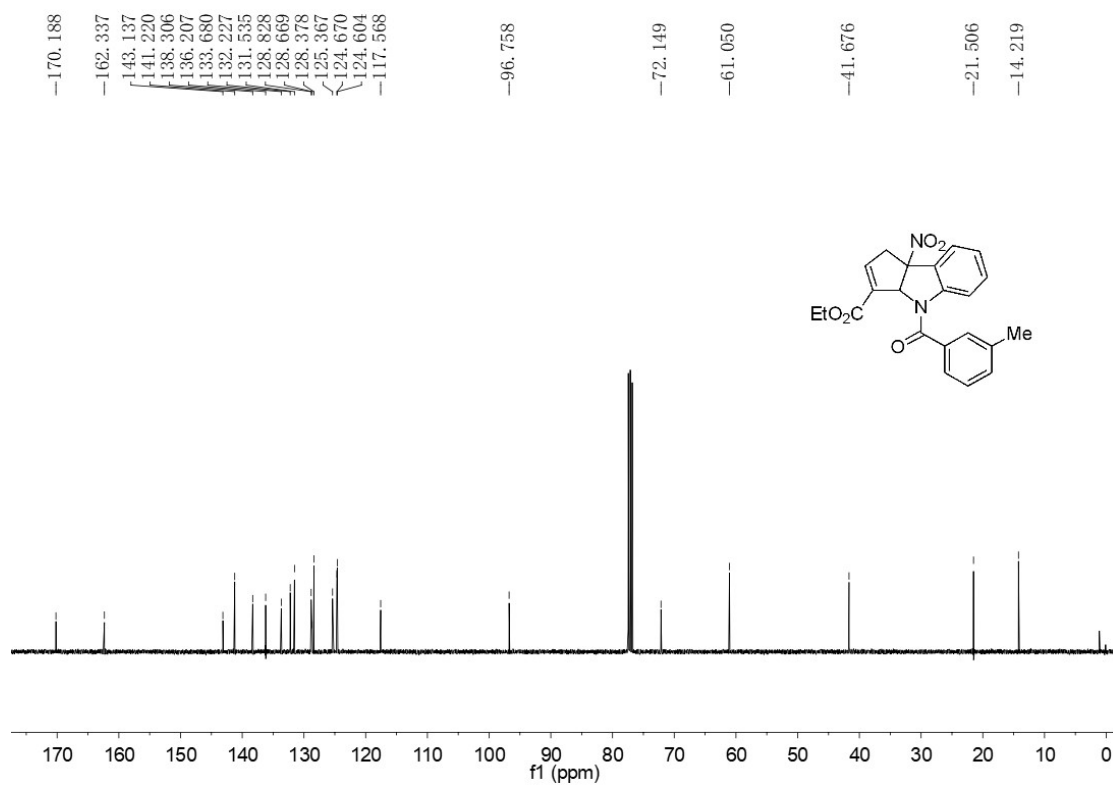

$^1\text{H}$  NMR (400 MHz,  $\text{CDCl}_3$ ) of compound **3ra**

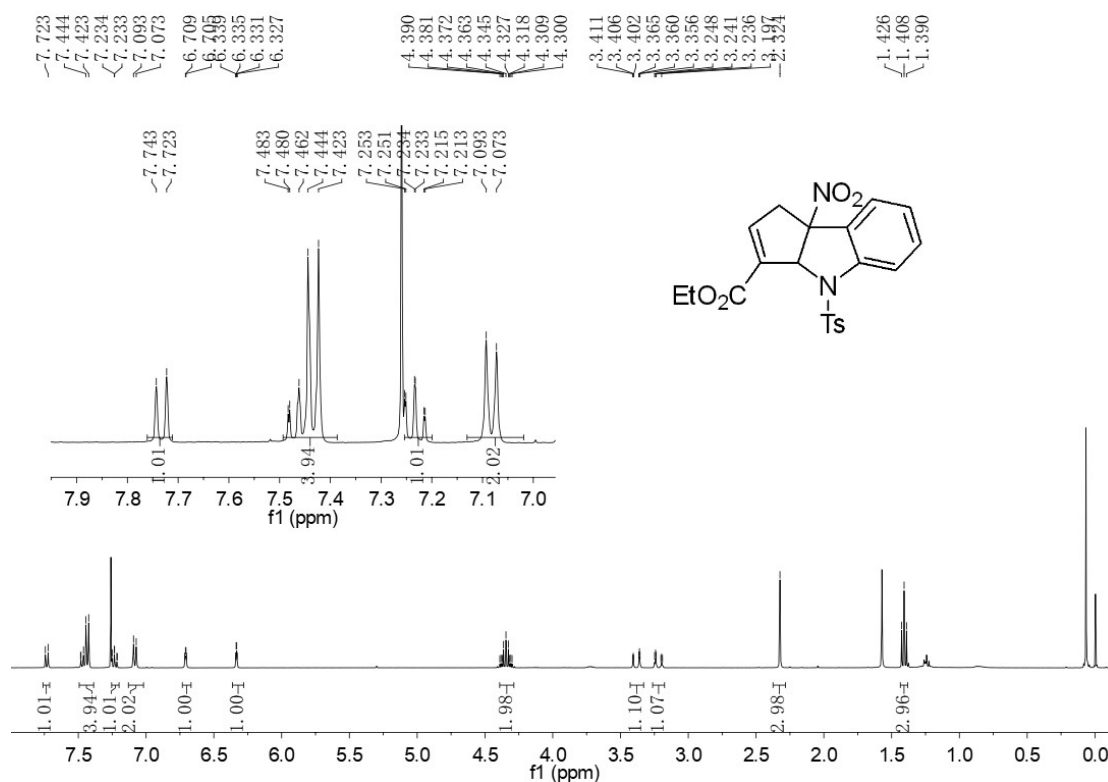

$^{13}\text{C}$  NMR (100 MHz,  $\text{CDCl}_3$ ) of compound **3ra**

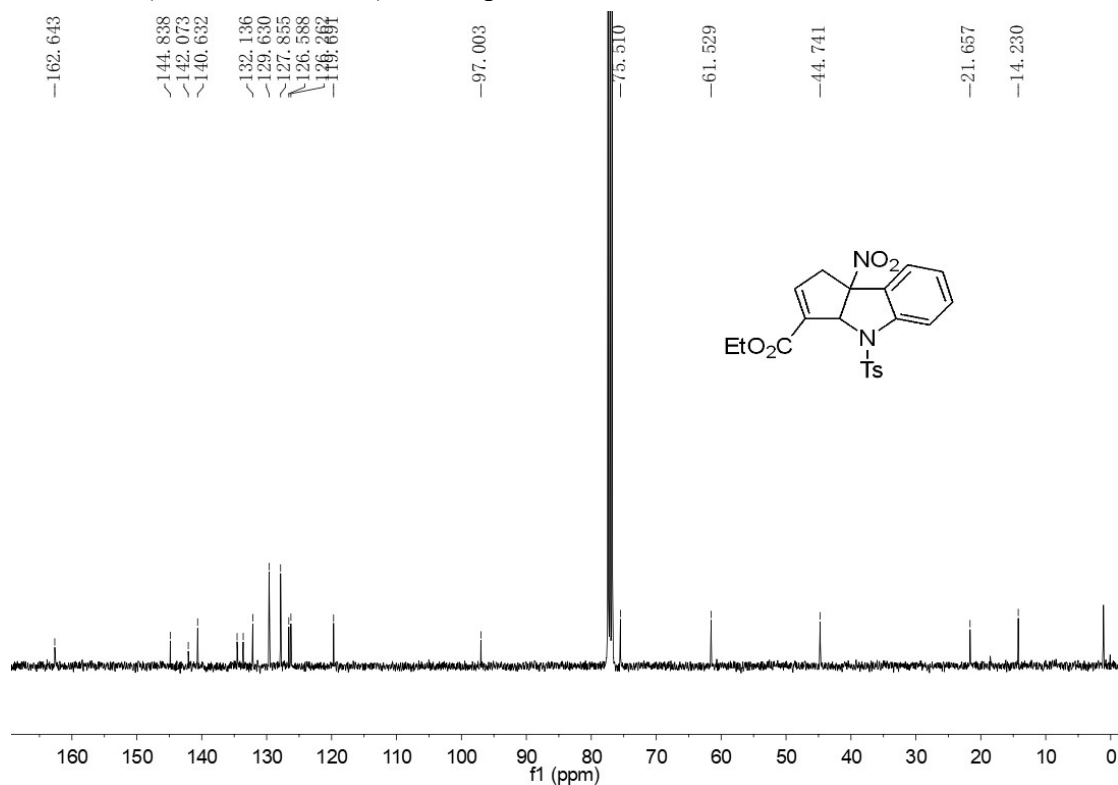

$^1\text{H}$  NMR (400 MHz,  $\text{CDCl}_3$ ) of compound **3sa**

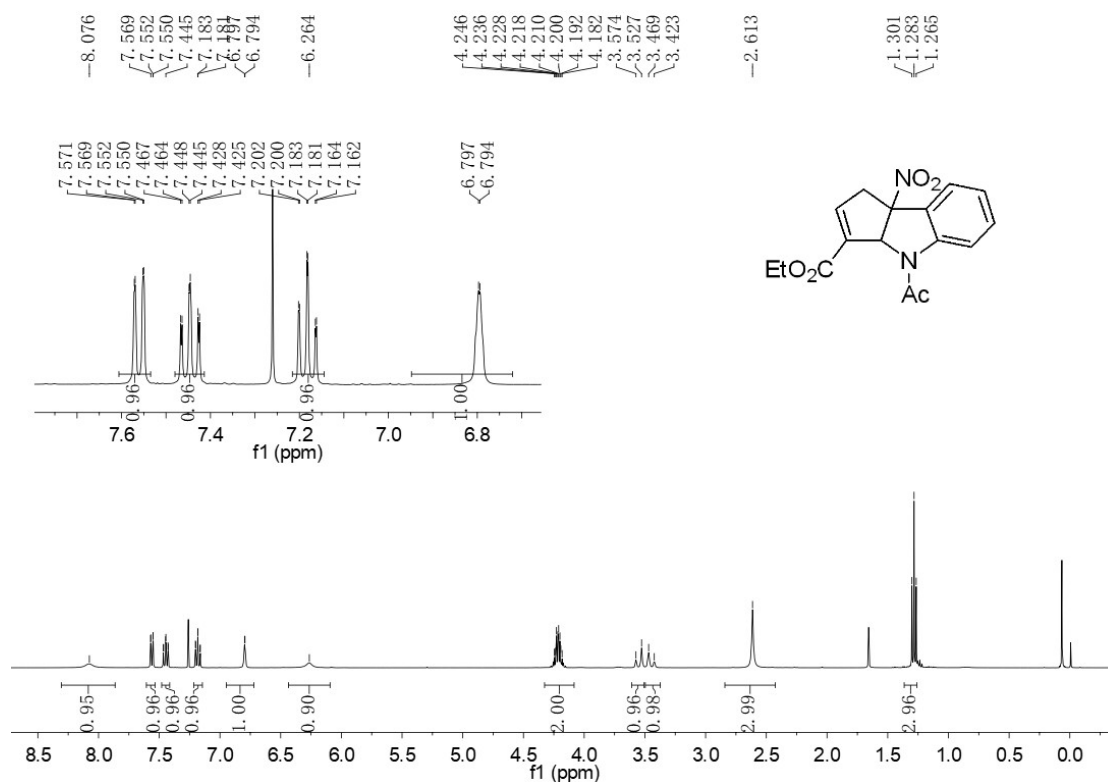

$^{13}\text{C}$  NMR (100 MHz,  $\text{CDCl}_3$ ) of compound **3sa**

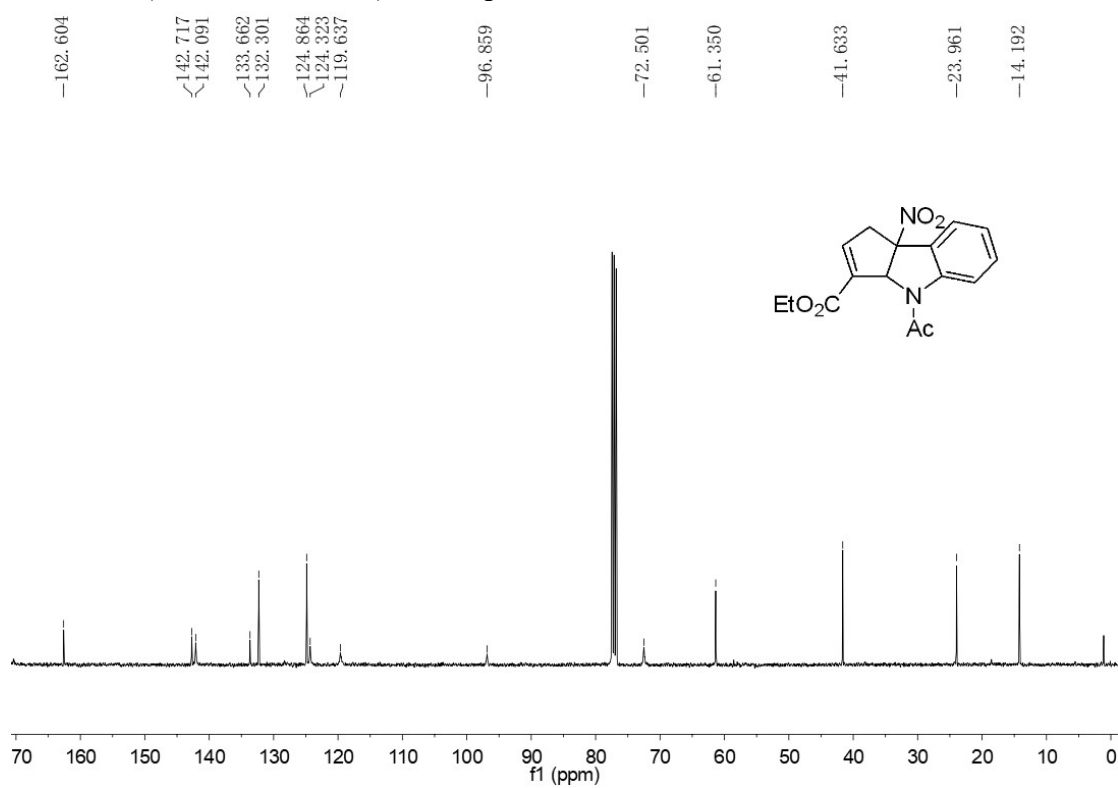

<sup>1</sup>H NMR (400 MHz, CDCl<sub>3</sub>) of compound **3ta**

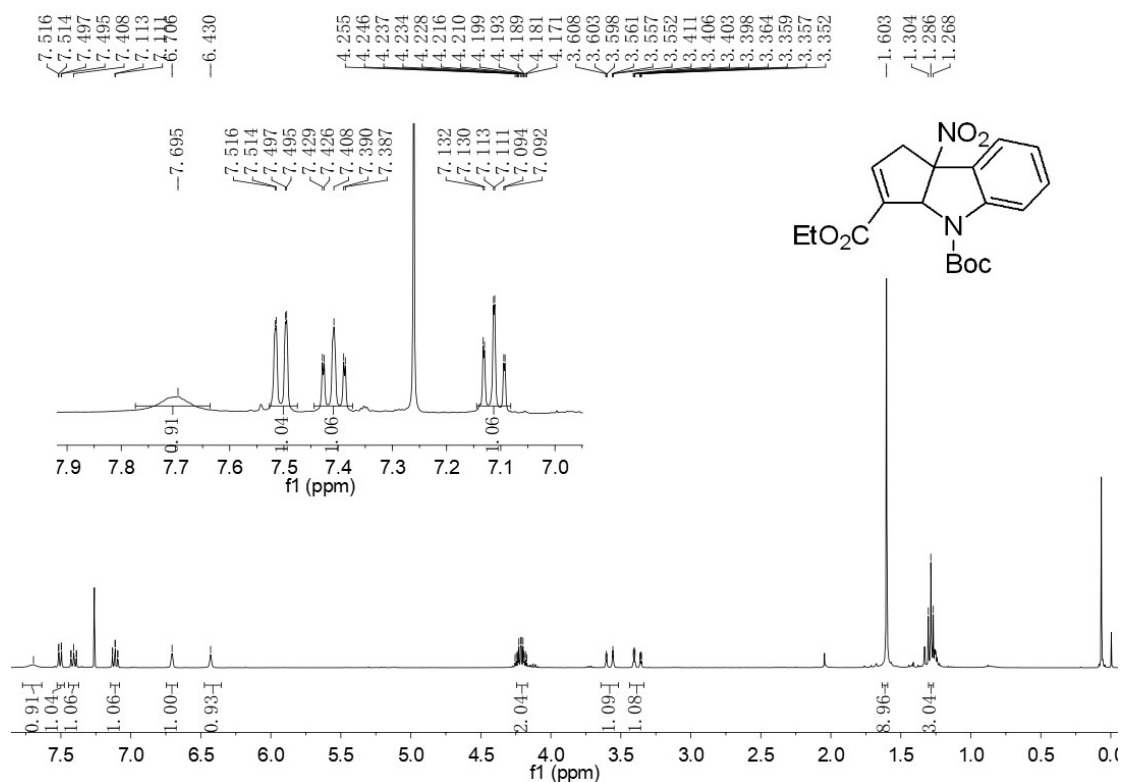

<sup>13</sup>C NMR (100 MHz, CDCl<sub>3</sub>) of compound **3ta**

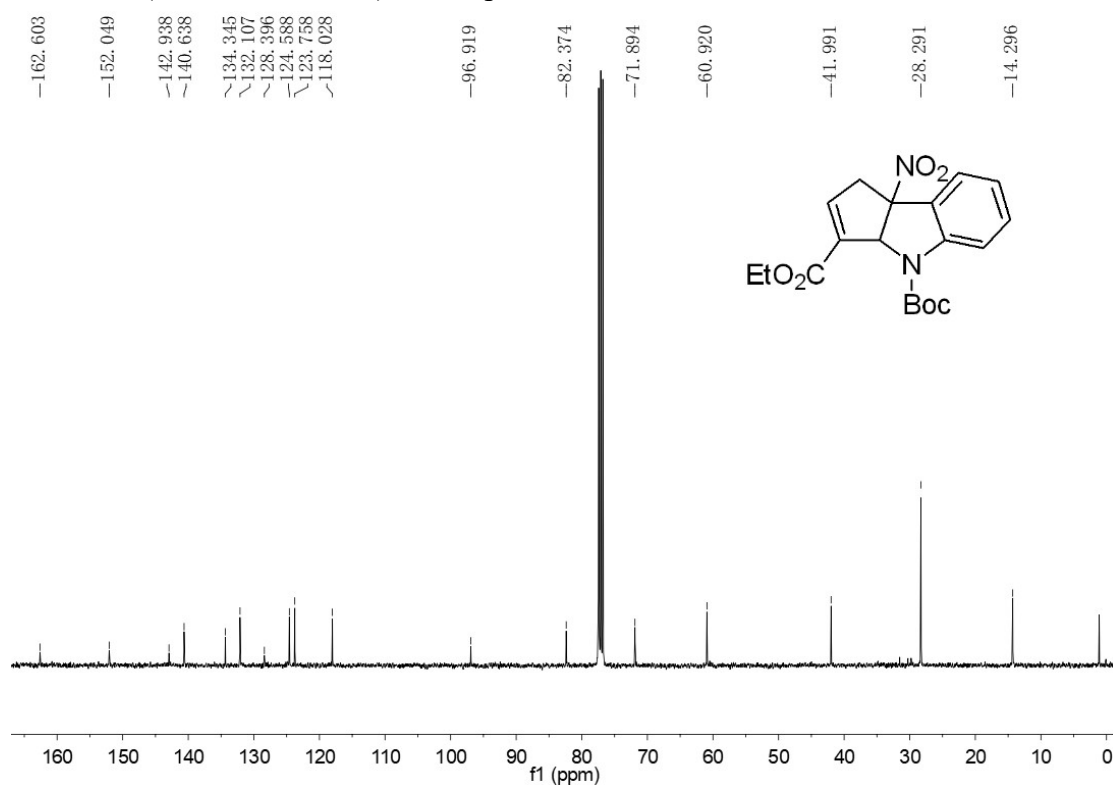

$^1\text{H}$  NMR (400 MHz,  $\text{CDCl}_3$ ) of compound **3ua**

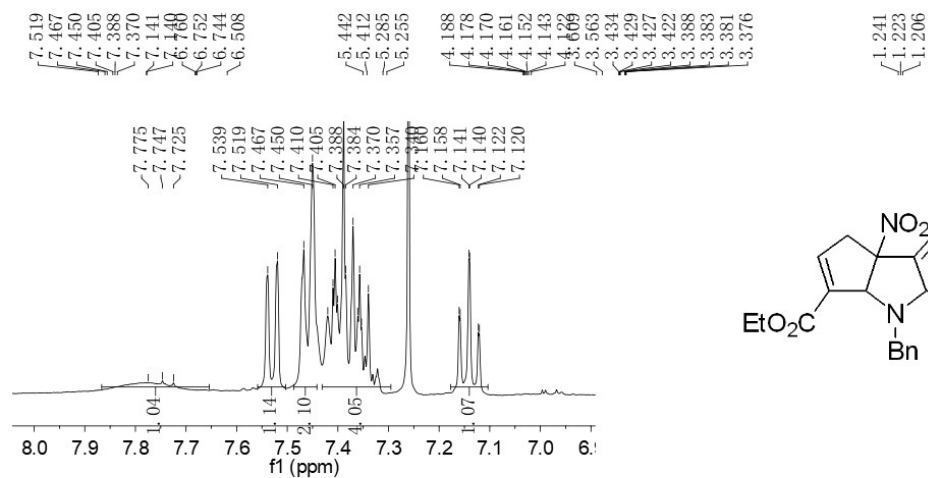

$^{13}\text{C}$  NMR (100 MHz,  $\text{CDCl}_3$ ) of compound **3ua**

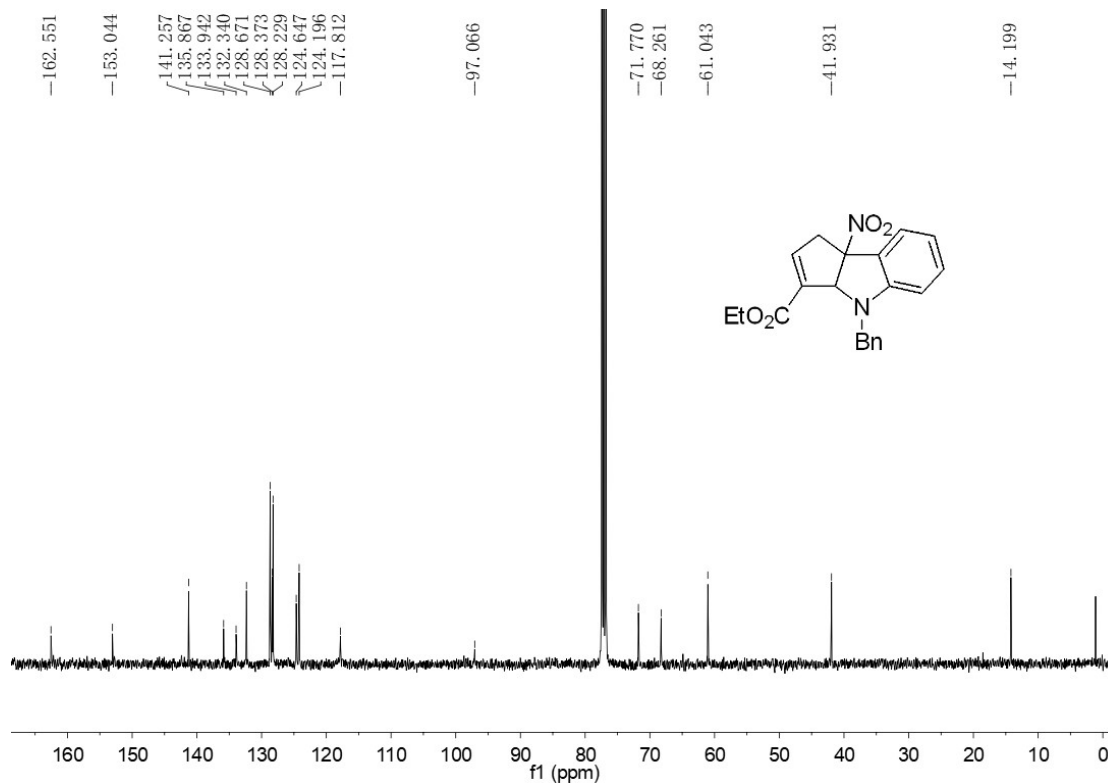

<sup>1</sup>H NMR (400 MHz, CDCl<sub>3</sub>) of compound **3ab**

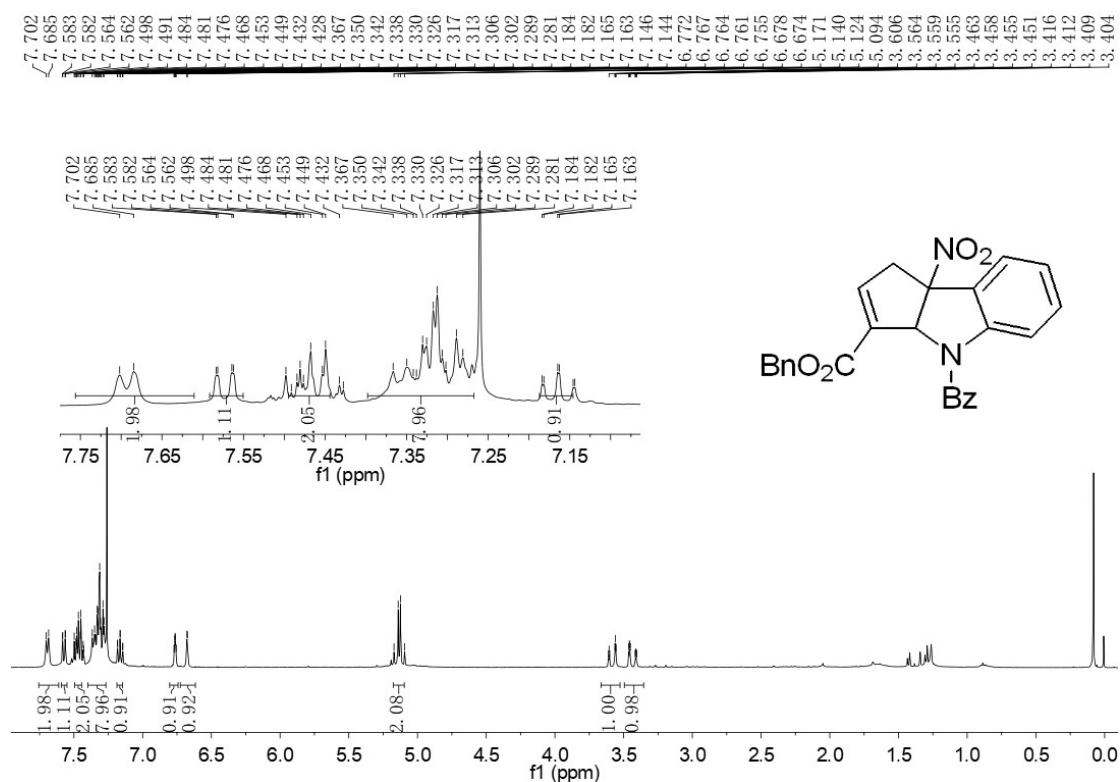

<sup>13</sup>C NMR (100 MHz, CDCl<sub>3</sub>) of compound **3ab**

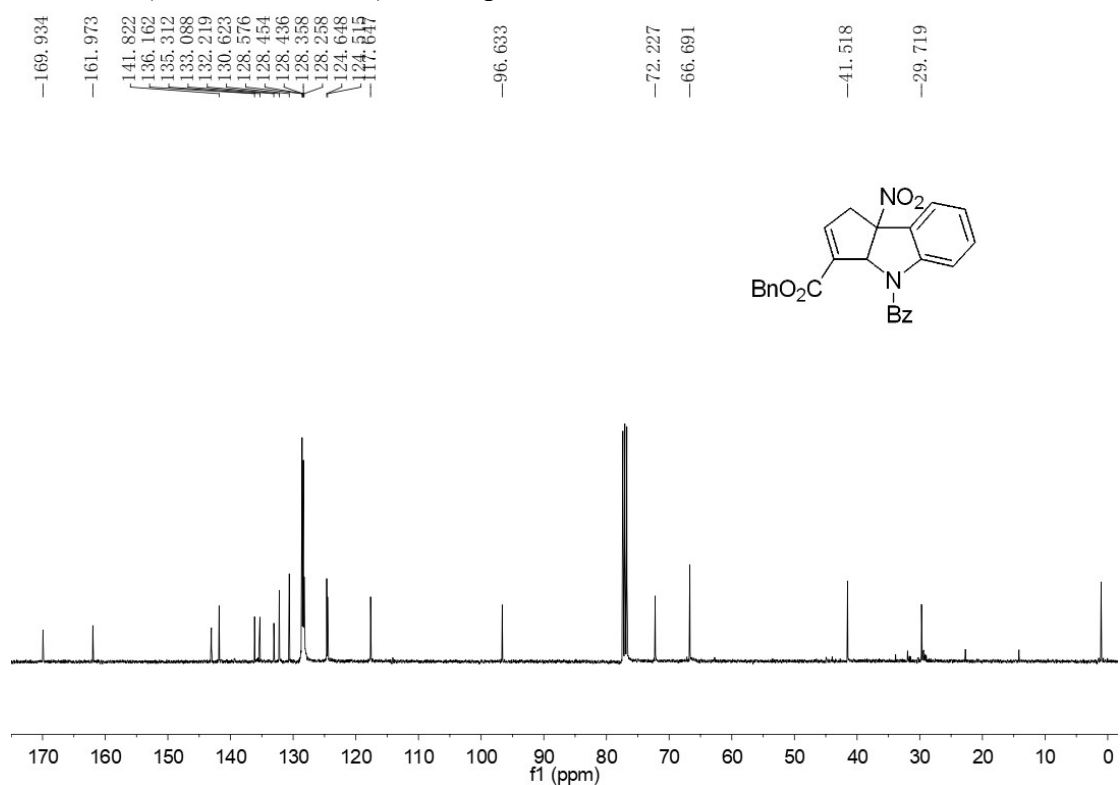

## 2. X-ray single crystal data for compound 3aa

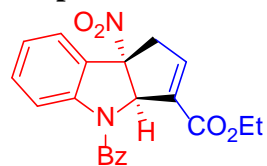

(relative configuration)  
**3aa**

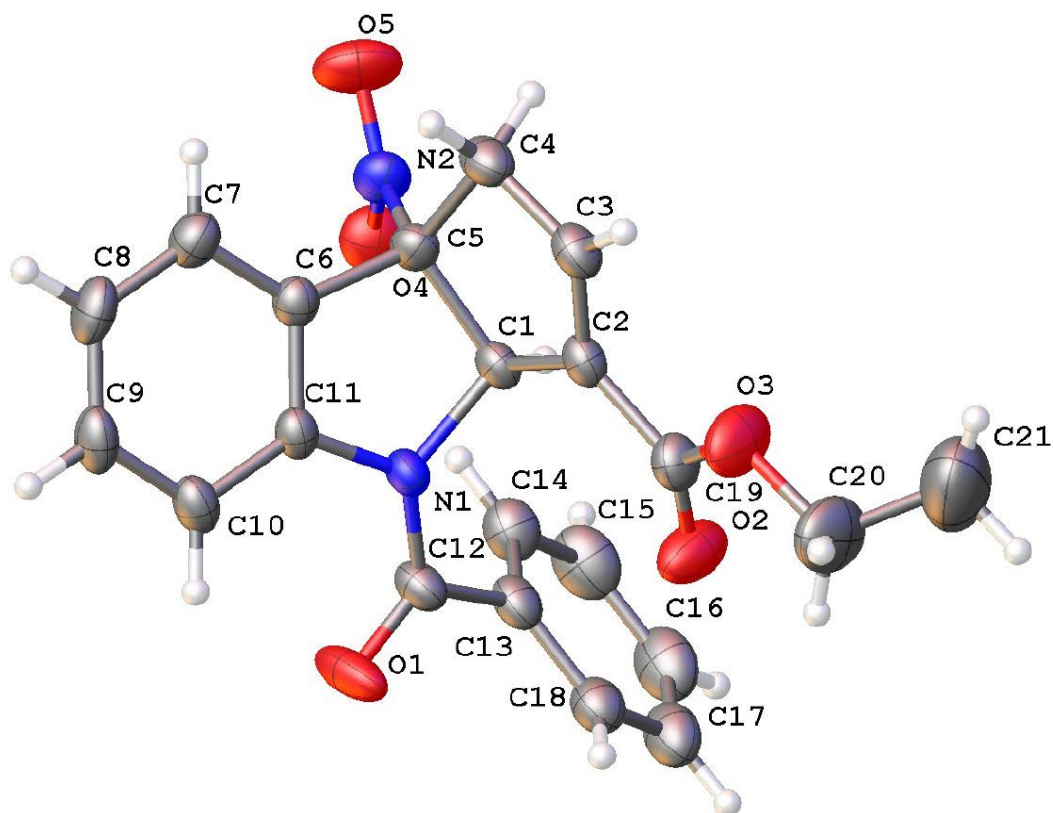

The thermal ellipsoid was drawn at the 30% probability level.

|                        |                                                               |                 |
|------------------------|---------------------------------------------------------------|-----------------|
| Empirical formula      | C <sub>21</sub> H <sub>18</sub> N <sub>2</sub> O <sub>5</sub> |                 |
| Formula weight         | 378.37                                                        |                 |
| Temperature            | 296.15 K                                                      |                 |
| Wavelength             | 0.71073 Å                                                     |                 |
| Crystal system         | Monoclinic                                                    |                 |
| Space group            | P 1 2 <sub>1</sub> /c 1                                       |                 |
| Unit cell dimensions   | a = 15.7507(18) Å                                             | α = 90°.        |
|                        | b = 9.3997(11) Å                                              | β = 93.560(2)°. |
|                        | c = 12.8142(15) Å                                             | γ = 90°.        |
| Volume                 | 1893.5(4) Å <sup>3</sup>                                      |                 |
| Z                      | 4                                                             |                 |
| Density (calculated)   | 1.327 Mg/m <sup>3</sup>                                       |                 |
| Absorption coefficient | 0.096 mm <sup>-1</sup>                                        |                 |



|                                   |                                                               |
|-----------------------------------|---------------------------------------------------------------|
| F(000)                            | 792                                                           |
| Crystal size                      | 0.5 x 0.2 x 0.2 mm <sup>3</sup>                               |
| Theta range for data collection   | 2.525 to 28.074°.                                             |
| Index ranges                      | -19<= <i>h</i> <=20, -10<= <i>k</i> <=12, -16<= <i>l</i> <=16 |
| Reflections collected             | 11052                                                         |
| Independent reflections           | 4370 [R(int) = 0.0255]                                        |
| Completeness to theta = 25.242°   | 99.6 %                                                        |
| Absorption correction             | Semi-empirical from equivalents                               |
| Max. and min. transmission        | 0.7457 and 0.6661                                             |
| Refinement method                 | Full-matrix least-squares on F <sup>2</sup>                   |
| Data / restraints / parameters    | 4370 / 19 / 254                                               |
| Goodness-of-fit on F <sup>2</sup> | 1.024                                                         |
| Final R indices [I>2sigma(I)]     | R1 = 0.0715, wR2 = 0.2062                                     |
| R indices (all data)              | R1 = 0.1139, wR2 = 0.2455                                     |
| Extinction coefficient            | n/a                                                           |
| Largest diff. peak and hole       | 0.827 and -0.469 e.Å <sup>-3</sup>                            |

### 3. HPLC copies of product 3aa

Racemic:

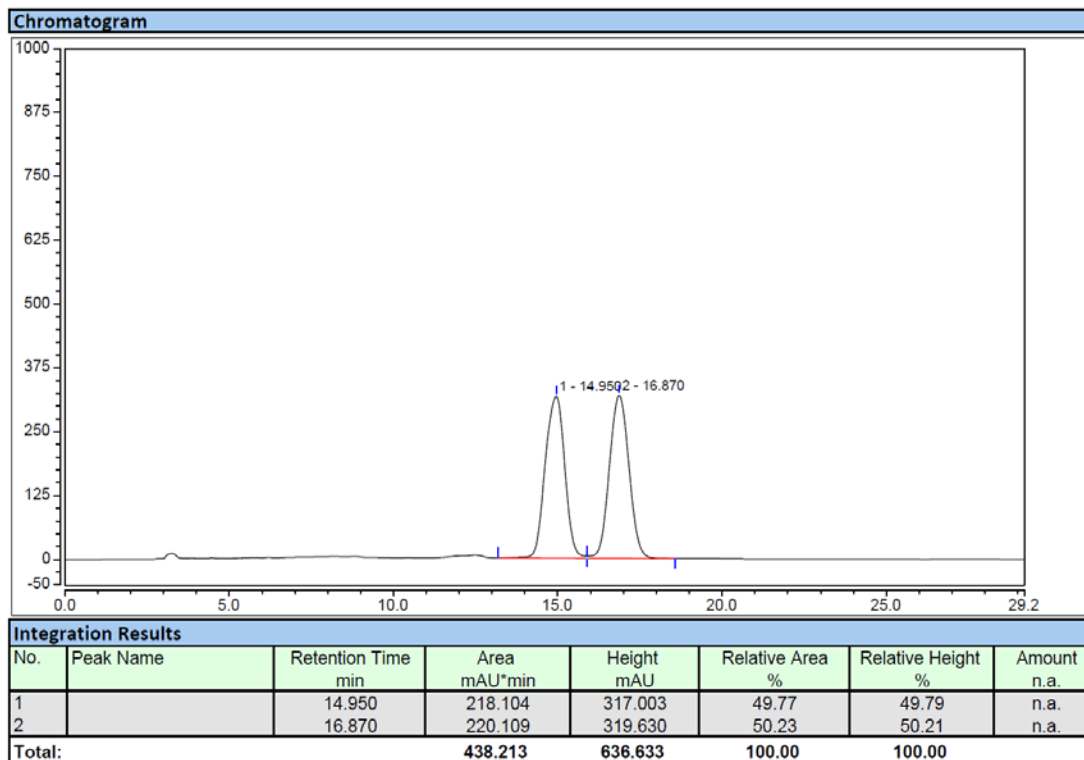

Enantioselective:

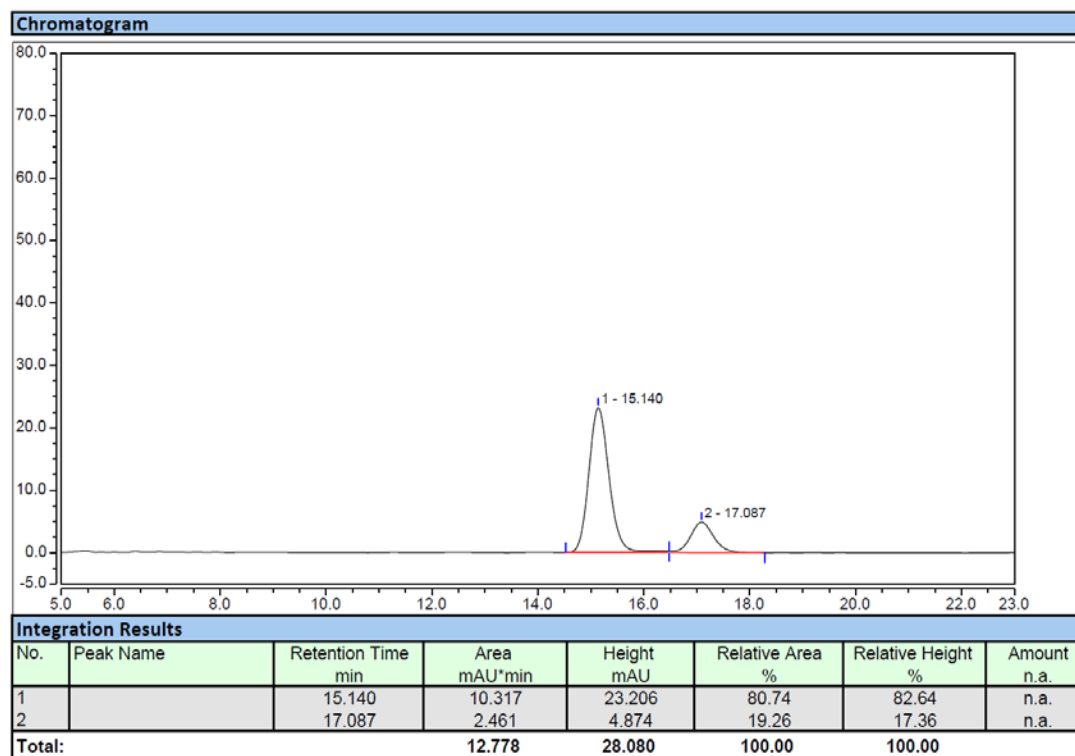

Supplement: c9ob00432g1.pdf [file c9ob00432g1.pdf]
